# Supplementary material for: Imidazolium ionic liquids containing selenium: synthesis and antimicrobial activity
Source: Royal Society of Chemistry journal article supplement (doi:10.1039/c0ob01010c), 2010-12-15
Supplement: c0ob01010c.pdf [file c0ob01010c.pdf]

## Electronic Supplementary Information

# Imidazolium Ionic Liquids Containing Selenium: Synthesis and Antimicrobial Activity

Eduardo E. Alberto, Luana L. Rossato, Sydney Hartz Alves, Diego Alves and Antonio L. Braga

**General.**  $^1\text{H}$  and  $^{13}\text{C}$  NMR spectra were recorded in  $\text{CDCl}_3$  with tetramethylsilane as internal standard or DMSO- $d_6$  unless otherwise noted. High resolution mass spectrometry (ESI mode) indicated the presence of the cation counterion. All solvents and chemicals were used as purchased unless otherwise noted.

**Representative Experimental Procedure to Prepare Ionic Liquids 3a-9a:** Diphenyl diselenide (5 mmol, 1.56 g) was diluted in a 1:1 mixture of EtOH:THF, (20 mL) and dropwise added to a solution of  $\text{NaBH}_4$  (15 mmol, 0.57 g) in dry  $\text{CH}_2\text{Cl}_2$  (50 mL).<sup>1</sup> After addition the solution was allowed to stir overnight at room temperature, and then successively washed with 15 mL of HCl 1M, water and brine. The organic layer was separated, dried over  $\text{MgSO}_4$  and concentrated under vacuum. To the crude compound obtained, N-methylimidazole (12 mmol, 0.96 mL) was added and the mixture was stirred at 100 °C during 4 hours. The reaction was allowed to reach room temperature, washed 3 times with  $\text{Et}_2\text{O}$  to remove unreacted starting materials and then dried under vacuum.

**Representative Experimental Procedure to Ion Exchange of Ionic Liquids:**  $\text{NaBF}_4$  (1.1 mmol, 121 mg) or  $\text{KPF}_6$  (1.1 mmol, 203 mg) was dissolved in water (2 mL) and added to the respective ionic liquid **3a-9a** (1 mmol) followed by overnight stirring at room temperature. After removal of water under reduced pressure, the mixture was diluted in warm MeCN (10 mL), dried over  $\text{MgSO}_4$  and concentrated under vacuum. Ionic liquids **3b** and **3c** were subjected to ion chromatography analysis to determine the amount of residual chloride. These samples were analyzed by an ion chromatography technique using an 850 Professional IC (Metrohm, Herisau, Switzerland) assembled with a conductometric detector. The total content of chloride in IL **3b** was  $2.58\% \pm 0.06$  (w/w) and  $0.14\% \pm 0.01$  (w/w) in **3c**. These results are the average of triplicate analysis.

**Biological Assays:** The *in vitro* antimicrobial activity of ionic liquids **3-9** was assessed against a panel of microorganisms, including bacteria (*Escherichia coli* ATCC 25922, *Staphylococcus aureus* ATCC 25923, *Pseudomonas aeruginosa* ATCC 27853), yeast like fungi (*Candida albicans* ATCC 24433), filamentous fungi (*Aspergillus fumigatus* ATCC 204305), and *Prototheca zopfii* (algae), according Table 2. The minimal inhibitory concentration (MIC) was determined by broth microdilution methods according to Clinical Laboratory and Standards Institute (CLSI) standards. Tested compounds were dissolved in DMSO, initially as 128  $\mu\text{g}/\text{mL}$  solutions, and then successively diluted with a culture medium to the final concentrations listed in Table 2 and Figure 1 (expressed in  $\mu\text{M}$ ). The antimicrobial activities were evaluated based on minimal inhibitory concentration (MIC), according to the CLSI procedures: M27-A3 for yeast

<sup>1</sup> X. Huang and D. H. Duan, *Synlett* 1998, 1191-1192.

like fungi and algae, M38-A2 for filamentous fungi and M07-08 for bacteria. All the assays were performed in triplicate.

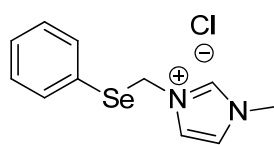

**(3a)** Yield: 76%;  $^1\text{H}$  NMR ( $\text{CDCl}_3$ , 400 MHz):  $\delta$  = 9.97 (s, 1H), 7.74 (s, 1H), 7.55-7.53 (m, 2H), 7.37-7.29 (m, 4H), 5.92 (s, 2H), 3.99 (s, 3H);  $^{13}\text{C}$  NMR ( $\text{CDCl}_3$ , 100 MHz):  $\delta$  = 136.76, 134.37, 129.56, 128.87, 126.08, 123.56, 121.73, 44.30, 36.37; HRMS  $m/z$  calcd. for  $[\text{C}_{11}\text{H}_{13}\text{N}_2\text{Se}]^+$ : 253.0238, found: 253.0238.

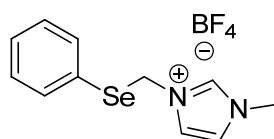

**(3b)** Yield: 61%;  $^1\text{H}$  NMR (DMSO, 400 MHz):  $\delta$  = 9.12 (s, 1H), 7.68-7.66 (m, 2H), 7.52-7.50 (m, 2H), 7.41-7.34 (m, 3H), 5.81 (s, 2H), 3.81 (s, 3H);  $^{13}\text{C}$  NMR (DMSO, 100 MHz):  $\delta$  = 136.32, 133.51, 129.53, 128.48, 126.62, 123.86, 122.24, 43.33, 35.75; HRMS  $m/z$  calcd. for  $[\text{C}_{11}\text{H}_{13}\text{N}_2\text{Se}]^+$ : 253.0238, found: 253.0238.

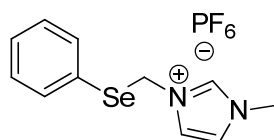

**(3c)** Yield: 71%;  $^1\text{H}$  NMR (DMSO, 400 MHz):  $\delta$  = 8.99 (s, 1H), 7.64-7.62 (m, 2H), 7.51-7.49 (m, 2H), 7.42-7.35 (m, 3H), 5.76 (s, 2H), 3.80 (s, 3H);  $^{13}\text{C}$  NMR (DMSO, 100 MHz):  $\delta$  = 136.34, 133.69, 129.63, 128.65, 126.66, 123.97, 122.34, 43.48, 35.83; HRMS  $m/z$  calcd. for  $[\text{C}_{11}\text{H}_{13}\text{N}_2\text{Se}]^+$ : 253.0238, found: 253.0238.

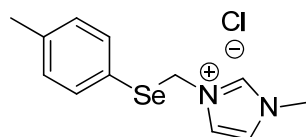

**(4a)** Yield: 71%;  $^1\text{H}$  NMR ( $\text{CDCl}_3$ , 400 MHz):  $\delta$  = 10.04 (s, 1H), 7.71 (s, 1H), 7.41 (d,  $J$  = 8.0 Hz, 2H), 7.26 (s, 1H), 7.13 (d,  $J$  = 8.0 Hz, 2H), 5.83 (s, 2H), 4.01 (s, 3H), 2.34 (s, 3H);  $^{13}\text{C}$  NMR ( $\text{CDCl}_3$ , 100 MHz):  $\delta$  = 139.45, 137.01, 134.85, 130.50, 123.60, 122.47, 121.72, 44.67, 36.52, 21.02; HRMS  $m/z$  calcd. for  $[\text{C}_{12}\text{H}_{15}\text{N}_2\text{Se}]^+$ : 267.0395, found: 267.0394.

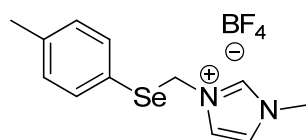

**(4b)** Yield: 68%;  $^1\text{H}$  NMR (DMSO, 500 MHz):  $\delta$  = 9.06 (s, 1H), 7.68 (s, 1H), 7.63 (s, 1H), 7.38 (d,  $J$  = 8.0 Hz, 2H), 7.17 (d,  $J$  = 8.0 Hz, 2H), 5.74 (s, 2H), 3.80 (s, 3H), 2.30 (s, 3H);  $^{13}\text{C}$  NMR (DMSO, 100 MHz):  $\delta$  = 138.33, 136.34, 133.97, 130.23, 123.87, 122.92, 122.27, 43.61, 35.80, 20.61; HRMS  $m/z$  calcd. for  $[\text{C}_{12}\text{H}_{15}\text{N}_2\text{Se}]^+$ : 267.0395, found: 267.0394.

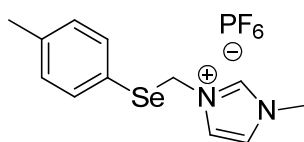

**(4c)** Yield: 69%;  $^1\text{H}$  NMR (DMSO, 500 MHz):  $\delta$  = 9.02 (s, 1H), 7.70 (s, 1H), 7.65 (s, 1H), 7.41 (d,  $J$  = 8.0 Hz, 2H), 7.21 (d,  $J$  = 8.0 Hz, 2H), 5.74 (s, 2H), 3.84 (s, 3H), 2.35 (s, 3H);  $^{13}\text{C}$  NMR (DMSO, 100 MHz):  $\delta$  = 138.46, 136.26, 134.07, 130.25, 123.93, 122.90, 122.30, 43.71, 35.83, 20.62; HRMS  $m/z$  calcd. for  $[\text{C}_{12}\text{H}_{15}\text{N}_2\text{Se}]^+$ : 267.0395, found: 267.0394.

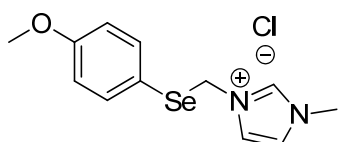

**(5a)** Yield: 51%;  $^1\text{H}$  NMR ( $\text{CDCl}_3$ , 500 MHz):  $\delta$  = 10.08 (s, 1H), 7.85 (s, 1H), 7.45 (d,  $J$  = 8.0 Hz, 2H), 7.32 (s, 1H), 6.84 (d,  $J$  = 8.0 Hz, 2H), 5.80 (s, 2H), 4.04 (s, 3H), 3.81 (s, 3H);  $^{13}\text{C}$  NMR ( $\text{CDCl}_3$ , 100 MHz):  $\delta$  = 160.37, 136.87, 136.76, 123.55, 121.70, 116.007, 115.24, 55.07, 44.75, 36.35; HRMS  $m/z$  calcd. for  $[\text{C}_{12}\text{H}_{15}\text{N}_2\text{OSe}]^+$ : 283.0344, found: 283.0344.

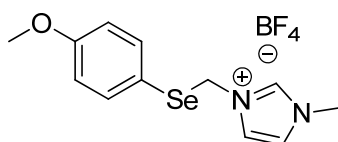

**(5b)** Yield: 48%;  $^1\text{H}$  NMR (DMSO, 500 MHz):  $\delta$  = 8.89 (s, 1H), 7.65 (s, 1H), 7.58 (s, 1H), 7.37 (d,  $J$  = 8.0 Hz, 2H), 6.92 (d,  $J$  = 8.0 Hz, 2H), 5.62 (s, 2H), 3.80 (s, 3H), 3.76 (s, 3H);  $^{13}\text{C}$  NMR (DMSO, 100 MHz):  $\delta$  = 160.01, 136.57, 136.25, 123.95, 122.25, 116.34, 115.27, 55.17, 44.17, 35.84; HRMS  $m/z$  calcd. for  $[\text{C}_{12}\text{H}_{15}\text{N}_2\text{OSe}]^+$ : 283.0344, found: 283.0344.

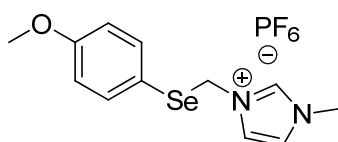

**(5c)** Yield: 45%;  $^1\text{H}$  NMR (DMSO, 500 MHz):  $\delta$  = 8.90 (s, 1H), 7.65 (s, 1H), 7.58 (s, 1H), 7.36 (d,  $J$  = 8.0 Hz, 2H), 6.92 (d,  $J$  = 8.0 Hz, 2H), 5.62 (s, 2H), 3.80 (s, 3H), 3.76 (s, 3H);  $^{13}\text{C}$  NMR (DMSO, 100 MHz):  $\delta$  = 160.14, 136.76, 136.25, 124.01, 122.34, 116.36, 115.38, 55.25, 44.33, 35.89; HRMS  $m/z$  calcd. for  $[\text{C}_{12}\text{H}_{15}\text{N}_2\text{OSe}]^+$ : 283.0344, found: 283.0344.

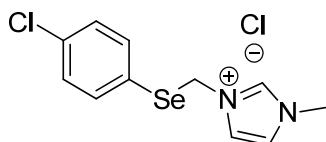

**(6a)** Yield: 69%;  $^1\text{H}$  NMR ( $\text{CDCl}_3$ , 500 MHz):  $\delta$  = 10.69 (s, 1H), 7.55 (d,  $J$  = 8.5 Hz, 2H), 7.32 (d,  $J$  = 9.0 Hz, 2H), 7.26-7.25 (m, 2H), 5.96 (s, 2H), 3.99 (s, 3H);  $^{13}\text{C}$  NMR ( $\text{CDCl}_3$ , 100 MHz):  $\delta$  = 137.12, 135.92, 135.33, 129.99, 124.65, 123.80, 122.24, 44.63, 36.76; HRMS  $m/z$  calcd. for  $[\text{C}_{11}\text{H}_{12}\text{ClN}_2\text{Se}]^+$ : 286.9849, found: 286.9847.

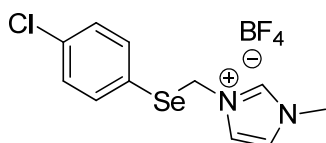

**(6b)** Yield: 66%;  $^1\text{H}$  NMR (DMSO, 400 MHz):  $\delta$  = 9.03 (s, 1H), 7.67-7.64 (m, 2H), 7.52 (d,  $J$  = 8.0 Hz, 2H), 7.42 (d,  $J$  = 8.0 Hz, 2H), 5.77 (s, 2H), 3.82 (s, 3H);

$^{13}\text{C}$  NMR ( $\text{CDCl}_3$ , 100 MHz):  $\delta = 137.03, 136.18, 134.42, 130.08, 125.98, 124.62, 122.91, 44.34, 36.46$ ; HRMS  $m/z$  calcd. for  $[\text{C}_{11}\text{H}_{12}\text{ClN}_2\text{Se}]^+$ : 286.9849, found: 286.9847.

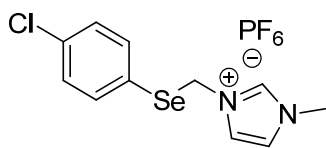

**(6c)** Yield: 62%;  $^1\text{H}$  NMR (DMSO, 400 MHz):  $\delta = 9.02$  (s, 1H), 7.67-7.64 (m, 2H), 7.52 (d,  $J = 8.0$  Hz, 2H), 7.42 (d,  $J = 8.0$  Hz, 2H), 5.77 (s, 2H), 3.82 (s, 3H);  $^{13}\text{C}$  NMR (DMSO, 100 MHz):  $\delta = 136.91, 136.12, 134.27, 130.09, 126.01, 124.61, 122.88, 44.24, 36.42$ ; HRMS  $m/z$  calcd. for  $[\text{C}_{11}\text{H}_{12}\text{ClN}_2\text{Se}]^+$ : 286.9849, found: 286.9847.

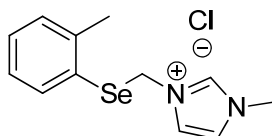

**(7a)** Yield: 66%;  $^1\text{H}$  NMR ( $\text{CDCl}_3$ , 500 MHz):  $\delta = 10.43$  (s, 1H), 7.50 (d,  $J = 8.0$  Hz, 1H), 7.30-7.27 (m, 3H), 7.16-7.13 (m, 2H), 5.81 (s, 2H), 3.99 (s, 3H), 2.44 (s, 3H);  $^{13}\text{C}$  NMR ( $\text{CDCl}_3$ , 100 MHz):  $\delta = 141.17, 137.02, 135.09, 130.66, 129.46, 127.12, 128.88, 121.89, 43.50, 36.54, 22.66$ ; HRMS  $m/z$  calcd. for  $[\text{C}_{12}\text{H}_{15}\text{N}_2\text{Se}]^+$ : 267.0395, found: 267.0394.

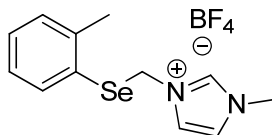

**(7b)** Yield: 56%;  $^1\text{H}$  NMR (DMSO, 400 MHz):  $\delta = 8.96$  (s, 1H), 7.64-7.63 (m, 2H), 7.43 (d,  $J = 8.0$  Hz, 1H), 7.33-7.28 (m, 2H), 7.18-7.12 (m, 1H), 5.72 (s, 2H), 3.80 (s, 3H), 2.33 (s, 3H);  $^{13}\text{C}$  NMR (DMSO, 100 MHz):  $\delta = 141.01, 136.89, 134.85, 130.95, 129.58, 127.94, 127.52, 124.46, 122.92, 43.18, 36.31, 22.59$ ; HRMS  $m/z$  calcd. for  $[\text{C}_{12}\text{H}_{15}\text{N}_2\text{Se}]^+$ : 267.0395, found: 267.0294.

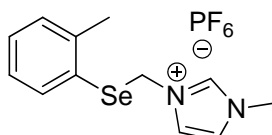

**(7c)** Yield: 61%;  $^1\text{H}$  NMR (DMSO, 400 MHz):  $\delta = 8.97$  (s, 1H), 7.65-7.63 (m, 2H), 7.43 (d,  $J = 8.0$  Hz, 1H), 7.36-7.29 (m, 2H), 7.20-7.14 (m, 1H), 5.72 (s, 2H), 3.80 (s, 3H), 2.34 (s, 3H);  $^{13}\text{C}$  NMR (DMSO, 100 MHz):  $\delta = 141.00, 136.89, 134.83, 130.95, 129.58, 127.96, 127.51, 124.46, 122.93, 43.20, 36.32, 22.58$ ; HRMS  $m/z$  calcd. for  $[\text{C}_{12}\text{H}_{15}\text{N}_2\text{Se}]^+$ : 267.0395, found: 267.0294.

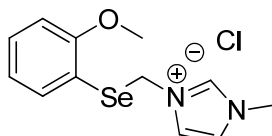

**(8a)** Yield: 65%;  $^1\text{H}$  NMR ( $\text{CDCl}_3$ , 400 MHz):  $\delta = 9.98$  (s, 1H), 7.59 (s, 1H), 7.34 (d,  $J = 8.0$  Hz, 1H), 7.29-7.20 (m, 2H), 6.82-6.75 (m, 2H), 5.73 (s, 2H), 3.90 (s, 3H), 3.78 (s, 3H);  $^{13}\text{C}$  NMR ( $\text{CDCl}_3$ , 100 MHz):  $\delta = 158.48, 137.19, 135.07, 130.88, 123.70, 122.07, 121.74, 114.86, 111.37, 56.14, 42.27, 36.61$ ; HRMS  $m/z$  calcd. for  $[\text{C}_{12}\text{H}_{15}\text{N}_2\text{OSe}]^+$ : 283.0344, found: 283.0347.

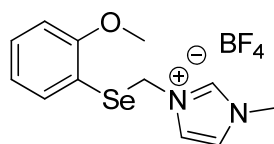

**(8b)** Yield: 64%; <sup>1</sup>H NMR (DMSO, 400 MHz): δ = 9.08 (s, 1H), 7.69 (s, 1H), 7.64 (s, 1H), 7.46 (d, *J* = 8.0 Hz, 1H), 7.39-7.34 (m, 1H), 7.05 (d, *J* = 8.0 Hz, 1H), 6.96-6.92 (m, 1H), 5.73 (s, 2H), 3.82 (s, 3H), 3.78 (s, 3H); <sup>13</sup>C NMR (DMSO, 100 MHz): δ = 158.22, 137.04, 133.48, 130.54, 124.29, 123.12, 122.01, 116.01, 111.98, 56.32, 41.93, 36.35; HRMS *m/z* calcd. for [C<sub>12</sub>H<sub>15</sub>N<sub>2</sub>OSe]<sup>+</sup>: 283.0344, found: 283.0347.

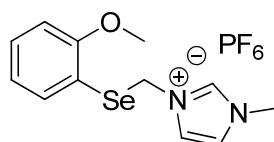

**(8c)** Yield: 57%; <sup>1</sup>H NMR (DMSO, 500 MHz): δ = 9.10 (s, 1H), 7.70 (s, 1H), 7.65 (s, 1H), 7.46 (d, *J* = 8.0 Hz, 1H), 7.36 (t, *J* = 8.0 Hz, 1H), 7.05 (d, *J* = 8.0 Hz, 1H), 6.93 (t, *J* = 8.0 Hz, 1H), 5.73 (s, 2H), 3.82 (s, 3H), 3.78 (s, 3H); <sup>13</sup>C NMR (DMSO, 75 MHz): δ = 157.65, 136.51, 132.92, 129.96, 123.74, 122.58, 121.44, 115.49, 111.40, 55.75, 41.38, 35.80; HRMS *m/z* calcd. for [C<sub>12</sub>H<sub>15</sub>N<sub>2</sub>OSe]<sup>+</sup>: 283.0344, found: 283.0347.

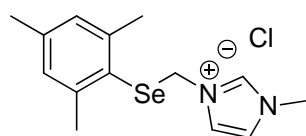

**(9a)** Yield: 62%; <sup>1</sup>H NMR (CDCl<sub>3</sub>, 400 MHz): δ = 9.76 (s, 1H), 7.52 (s, 1H), 6.96 (s, 1H), 6.93 (s, 2H), 5.58 (s, 2H), 3.98 (s, 3H), 2.33 (s, 6H), 2.26 (s, 3H); <sup>13</sup>C NMR (CDCl<sub>3</sub>, 100 MHz): δ = 143.31, 140.15, 137.35, 129.22, 124.79, 123.47, 121.80, 43.67, 36.75, 24.18, 20.99; HRMS *m/z* calcd. for [C<sub>14</sub>H<sub>19</sub>N<sub>2</sub>Se]<sup>+</sup>: 295.0708, found: 295.0703.

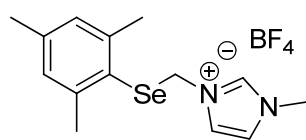

**(9b)** Yield: 54%; <sup>1</sup>H NMR (DMSO, 400 MHz): δ = 8.80 (s, 1H), 7.64 (s, 1H), 7.52 (s, 1H), 7.00 (s, 2H), 5.49 (s, 2H), 3.80 (s, 3H), 2.22 (s, 6H); <sup>13</sup>C NMR (DMSO, 100 MHz): δ = 143.54, 139.79, 136.66, 129.19, 124.36, 122.99, 43.49, 36.24, 24.11, 20.98; HRMS *m/z* calcd. for [C<sub>14</sub>H<sub>19</sub>N<sub>2</sub>Se]<sup>+</sup>: 295.0708, found: 295.0703.

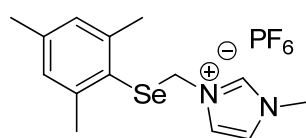

**(9c)** Yield: 54%; <sup>1</sup>H NMR (DMSO, 400 MHz): δ = 8.80 (s, 1H), 7.64 (s, 1H), 7.52 (s, 1H), 7.00 (s, 2H), 5.49 (s, 2H), 3.80 (s, 3H), 2.26 (s, 6H); <sup>13</sup>C NMR (DMSO, 100 MHz): δ = 143.54, 139.79, 136.66, 129.19, 124.36, 122.99, 43.49, 36.24, 24.11, 20.98; HRMS *m/z* calcd. for [C<sub>14</sub>H<sub>19</sub>N<sub>2</sub>Se]<sup>+</sup>: 295.0708, found: 295.0703.

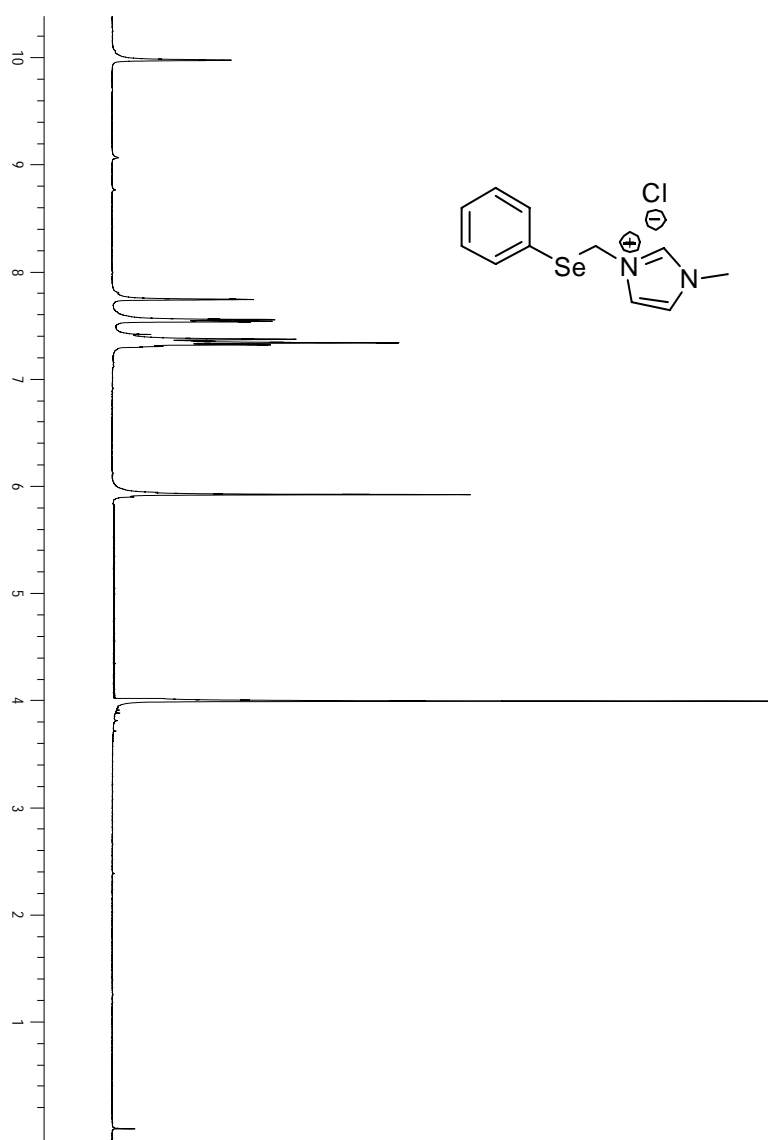

$^1\text{H}$  NMR of compound **3a** ( $\text{CDCl}_3$ , 400 MHz).

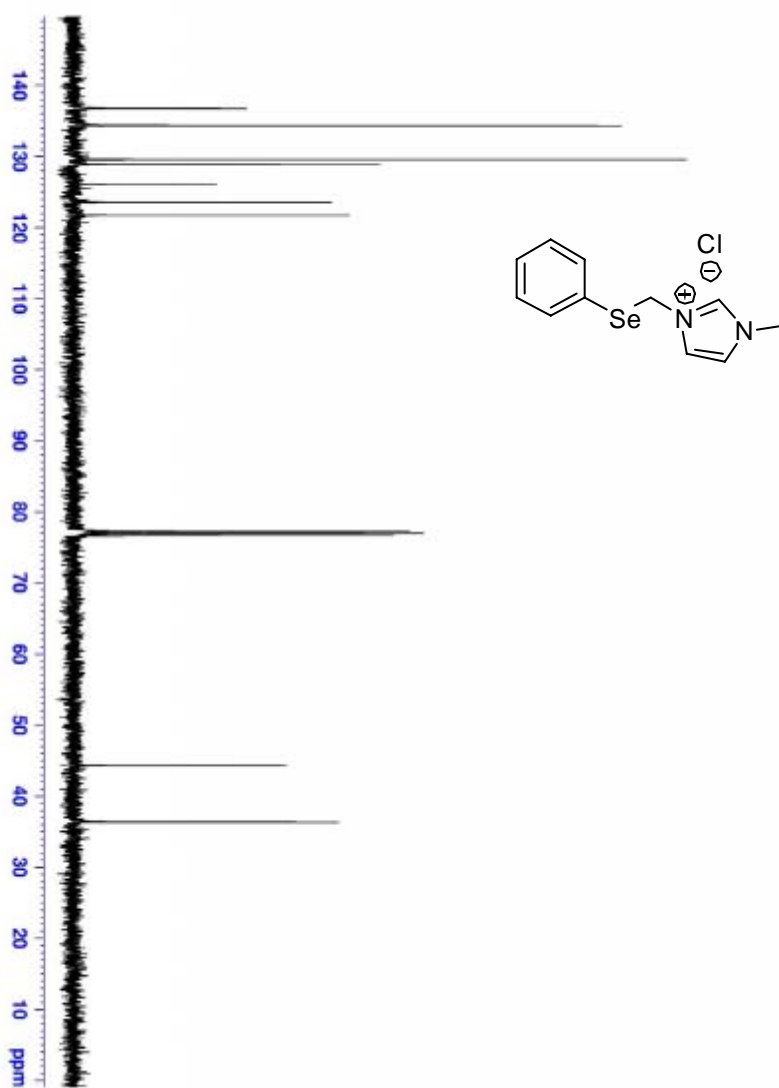

$^{13}\text{C}$  NMR of compound **3a** ( $\text{CDCl}_3$ , 100 MHz).

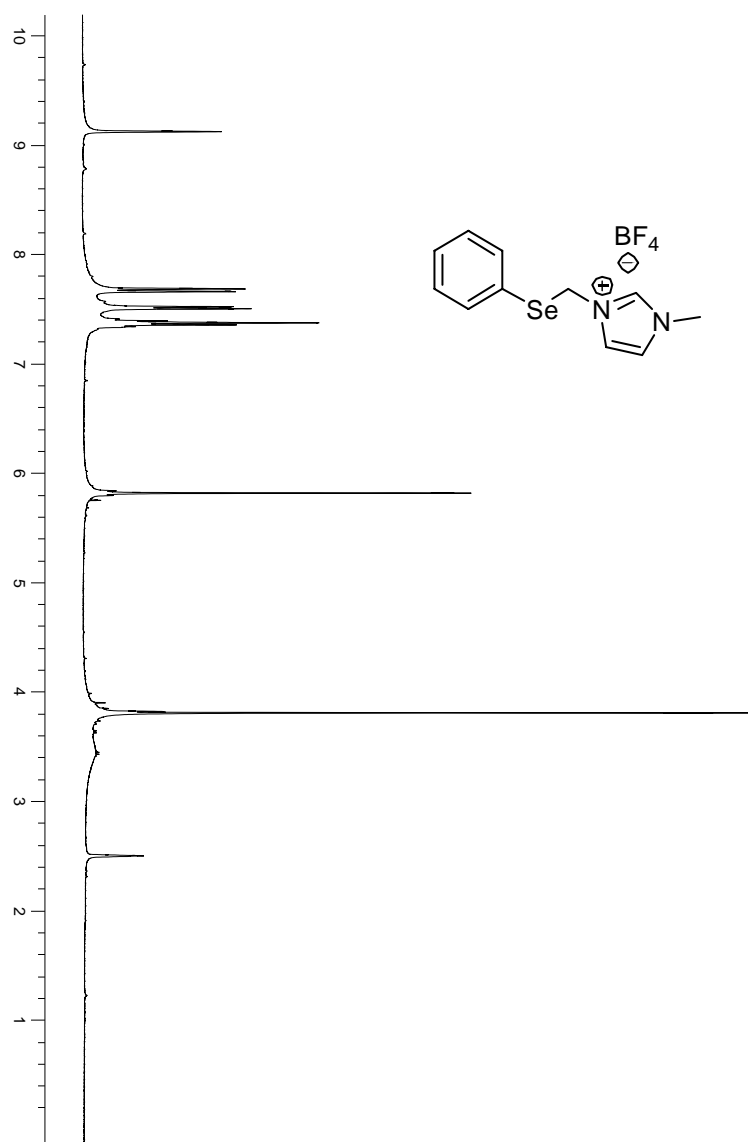

$^1\text{H}$  NMR of compound **3b** (DMSO, 400 MHz).



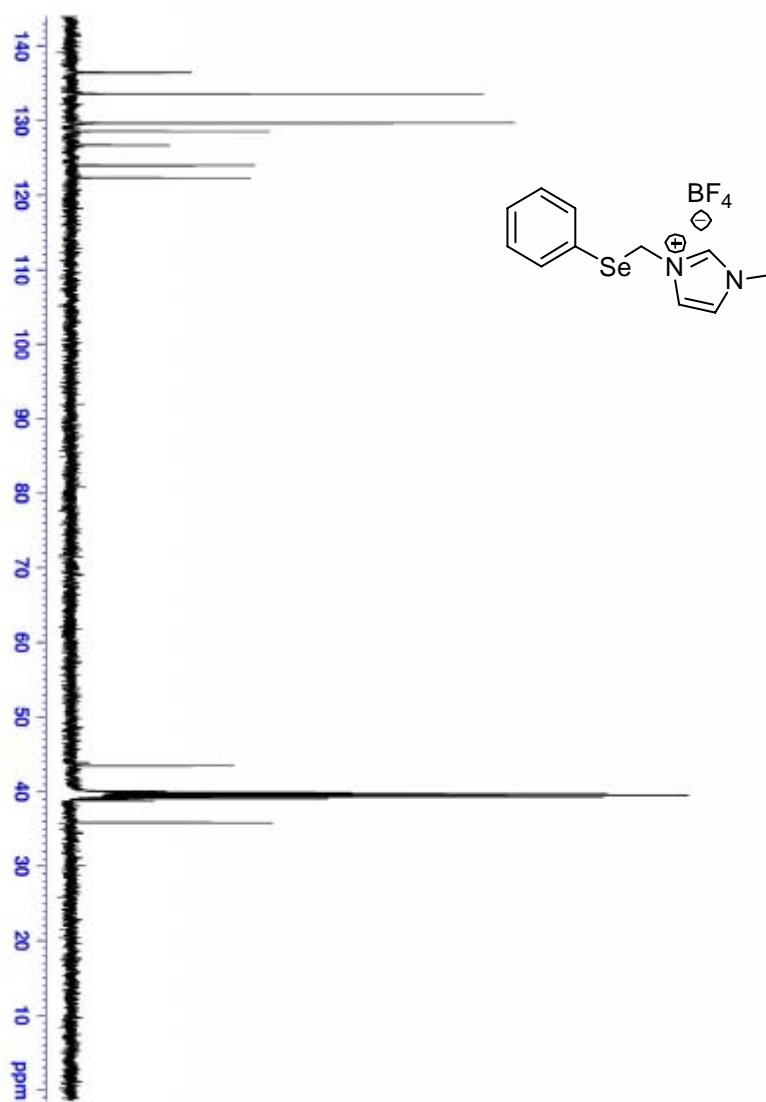

<sup>13</sup>C NMR of compound **3b** (DMSO, 100 MHz).

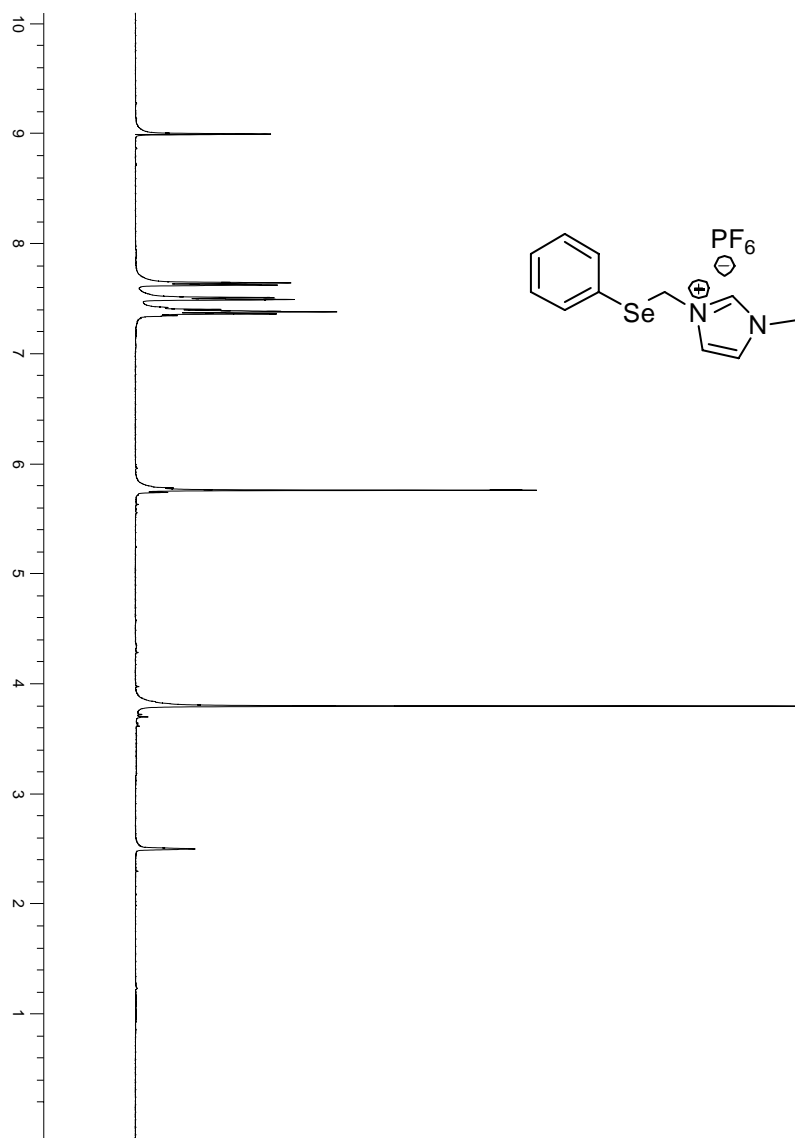

$^1\text{H}$  NMR of compound **3c** (DMSO, 400 MHz).

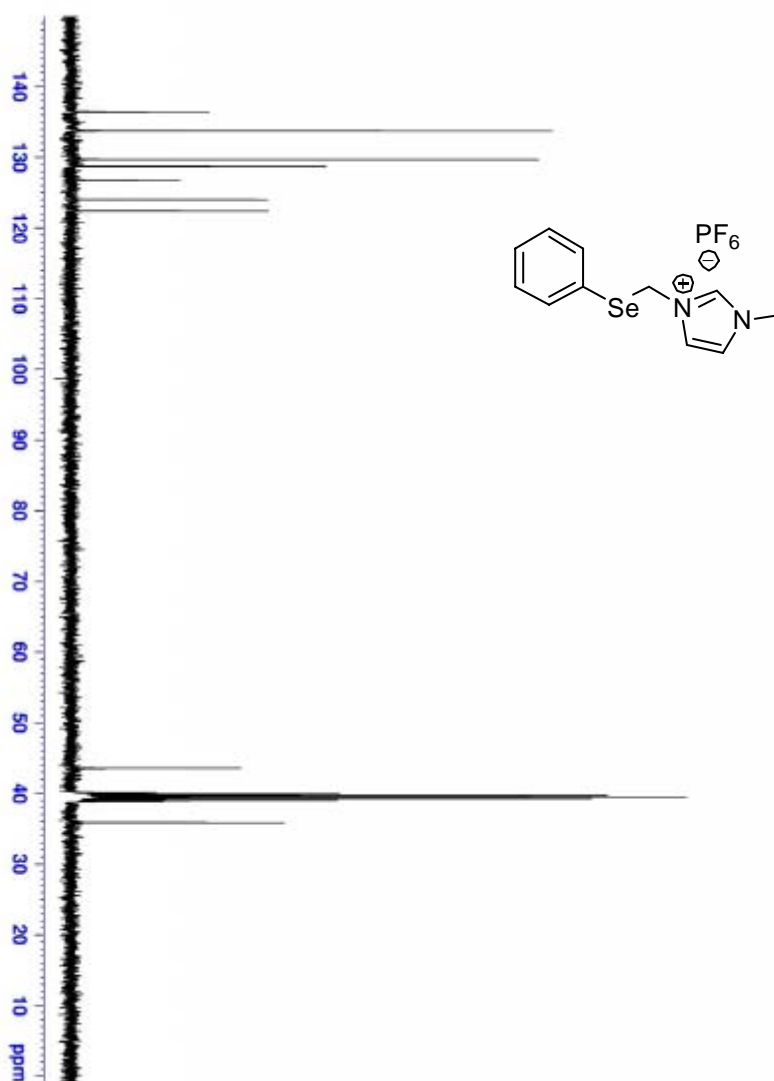

$^{13}\text{C}$  NMR of compound **3c** (DMSO, 100 MHz).

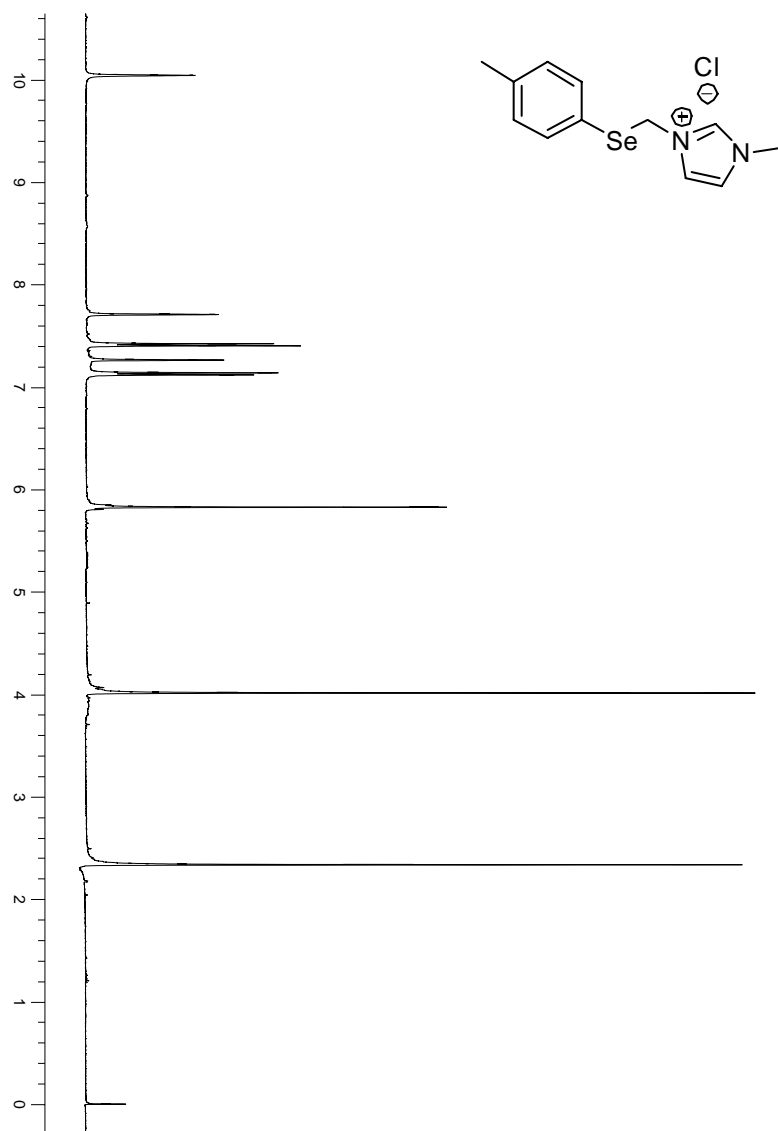

$^1\text{H}$  NMR of compound **4a** ( $\text{CDCl}_3$ , 400 MHz).

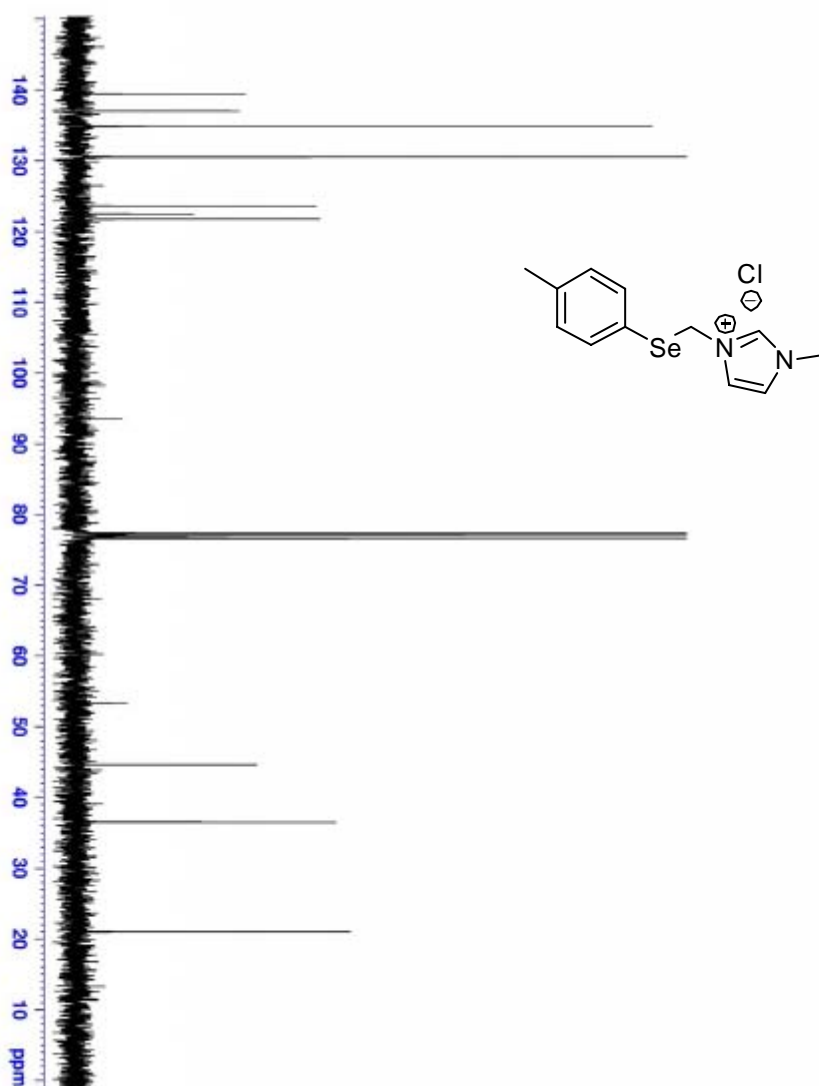

$^{13}\text{C}$  NMR of compound **4a** ( $\text{CDCl}_3$ , 100 MHz).



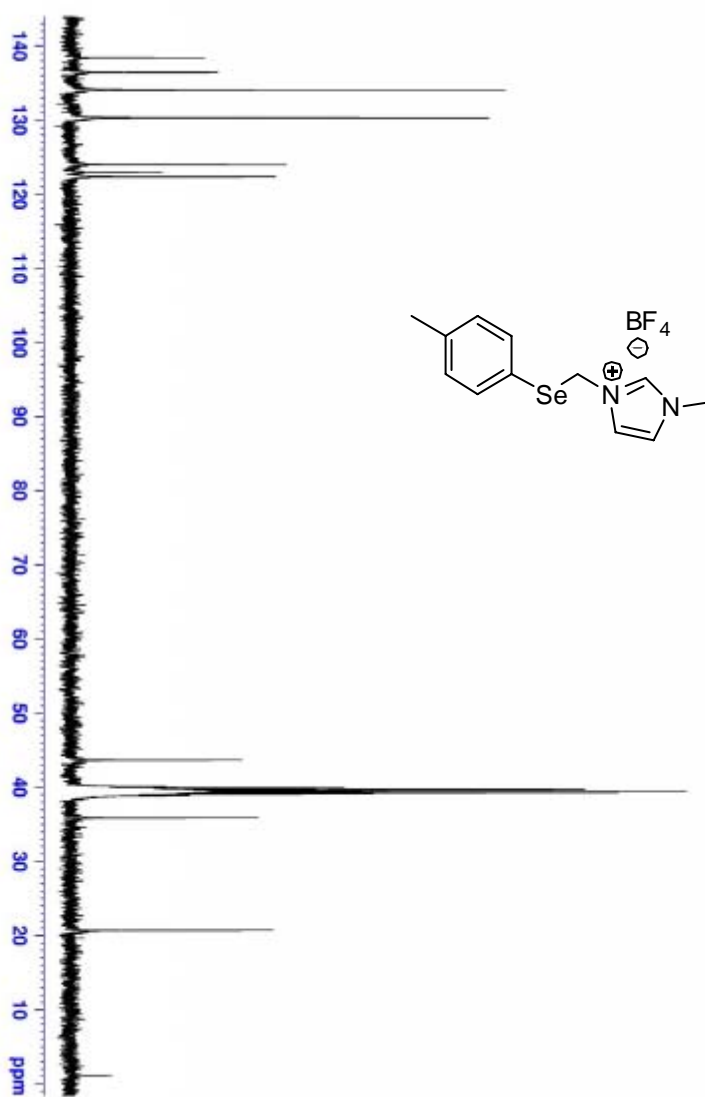

$^{13}\text{C}$  NMR of compound **4b** (DMSO, 100 MHz).





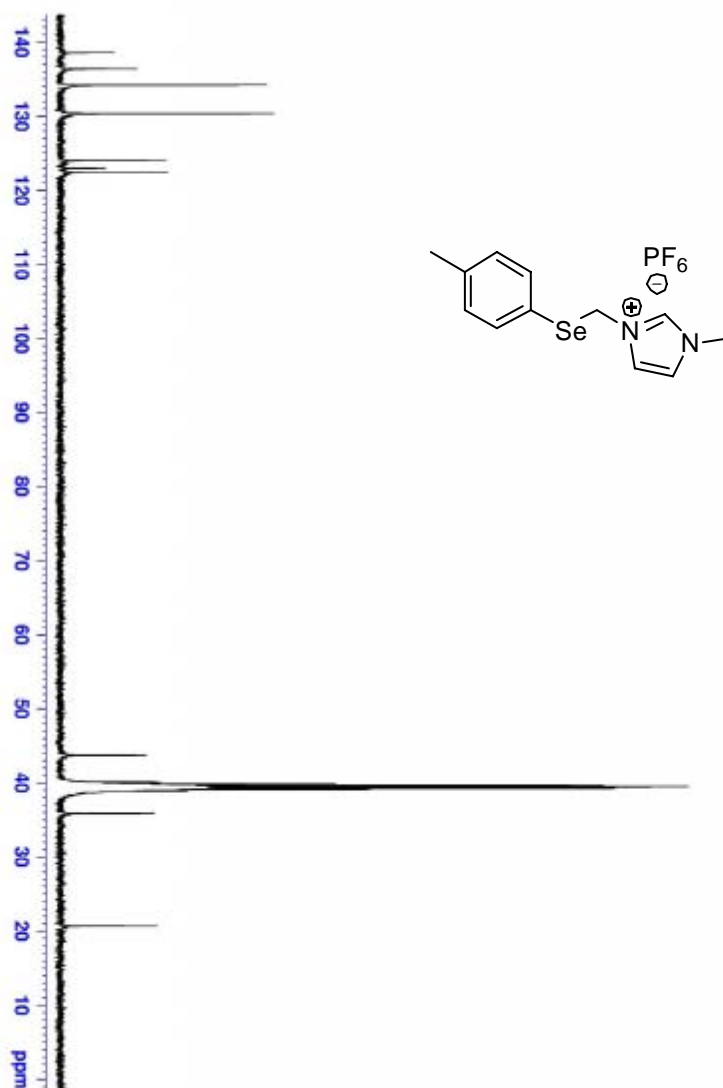

$^{13}\text{C}$  NMR of compound **4c** (DMSO, 100 MHz).

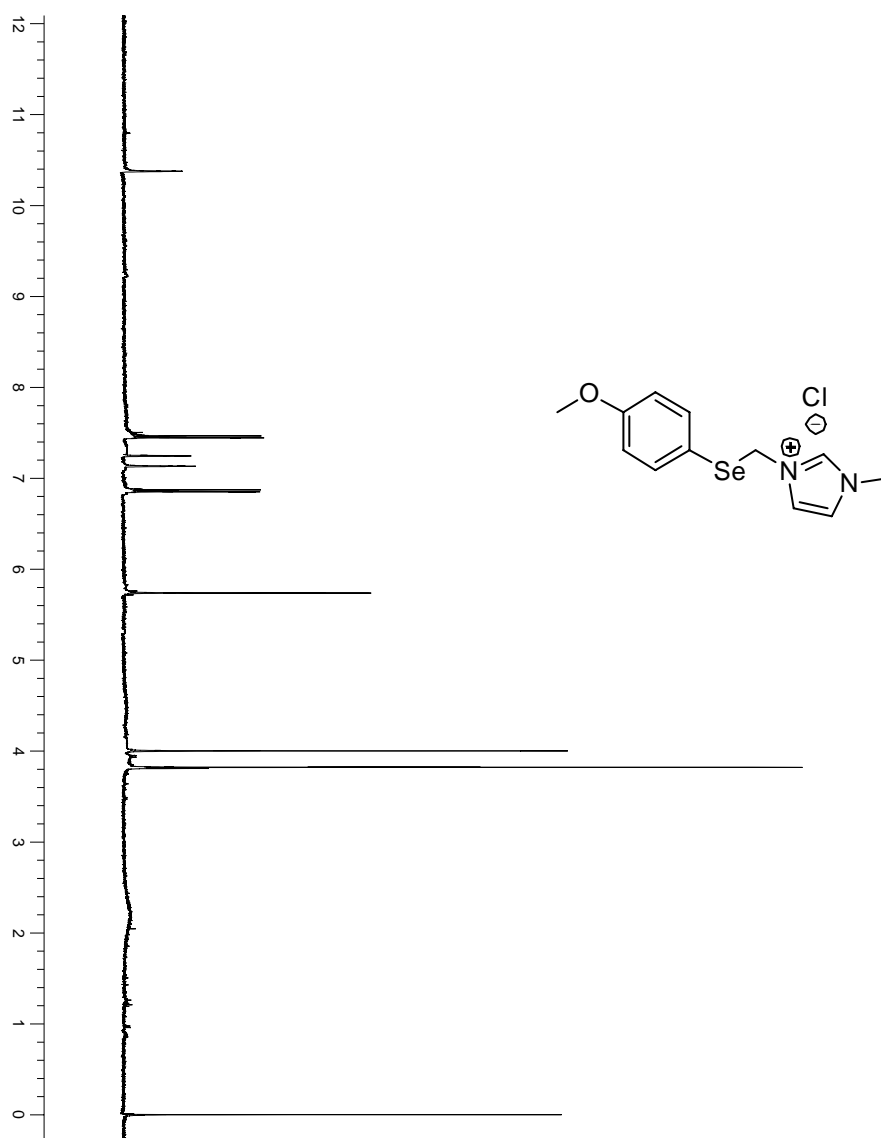

$^1\text{H}$  NMR of compound **5a** ( $\text{CDCl}_3$ , 400 MHz).

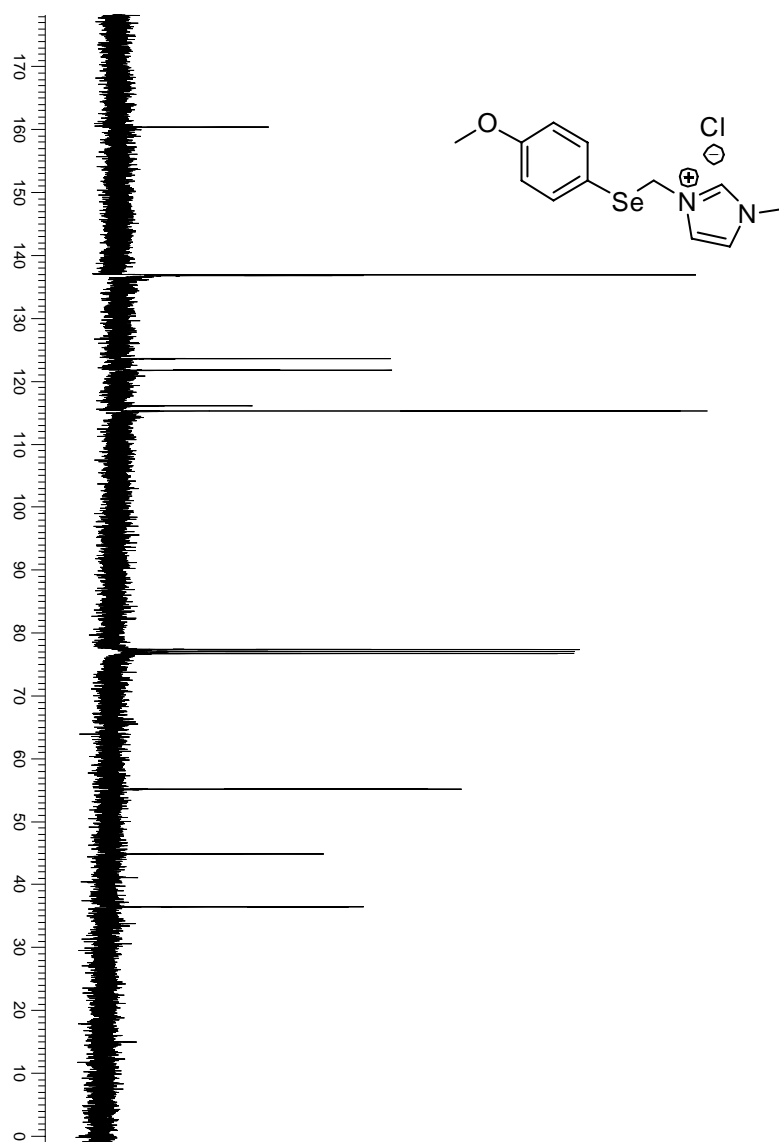

$^{13}\text{C}$  NMR of compound **5a** ( $\text{CDCl}_3$ , 100 MHz).

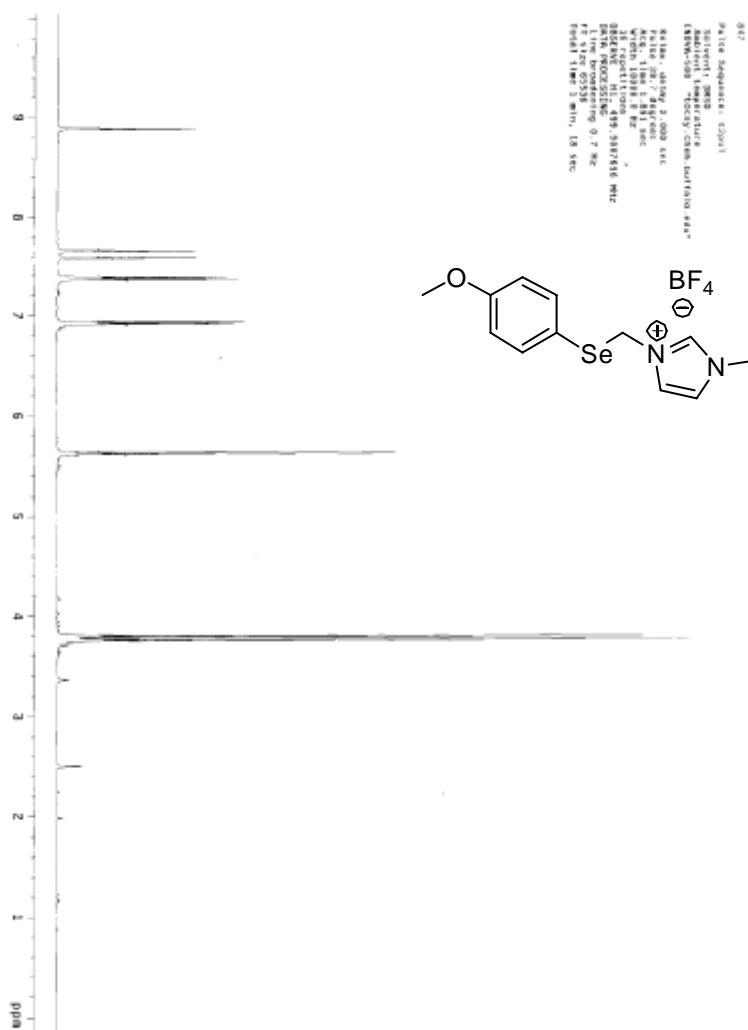

$^1\text{H}$  NMR of compound **5b** (DMSO, 400 MHz).

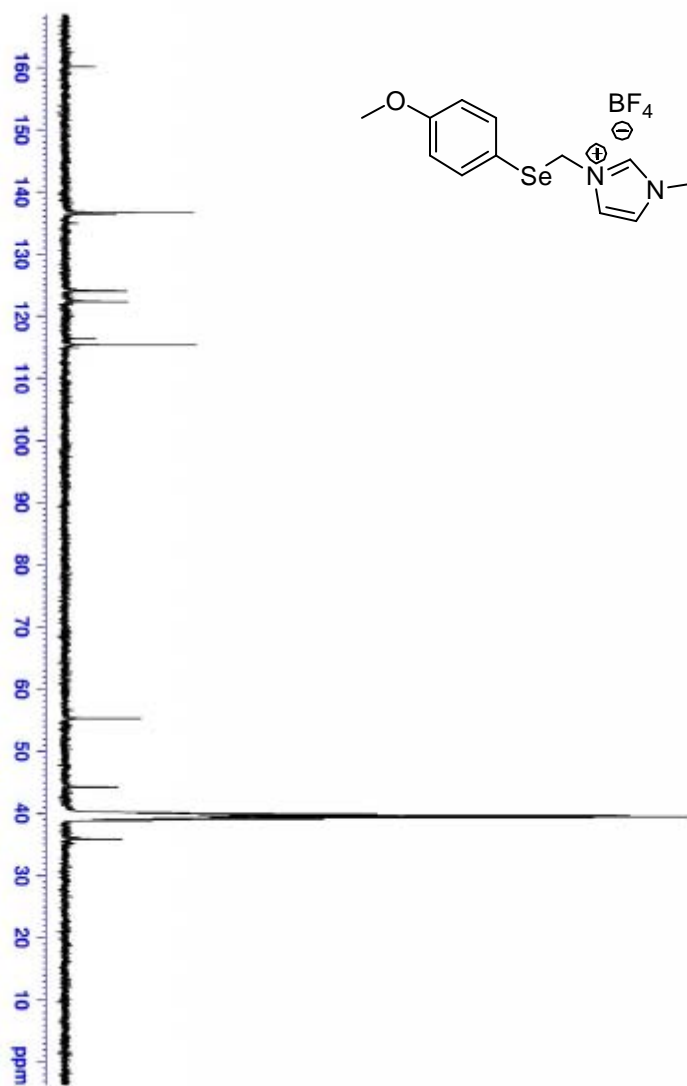

$^{13}\text{C}$  NMR of compound **5b** (DMSO, 100 MHz).



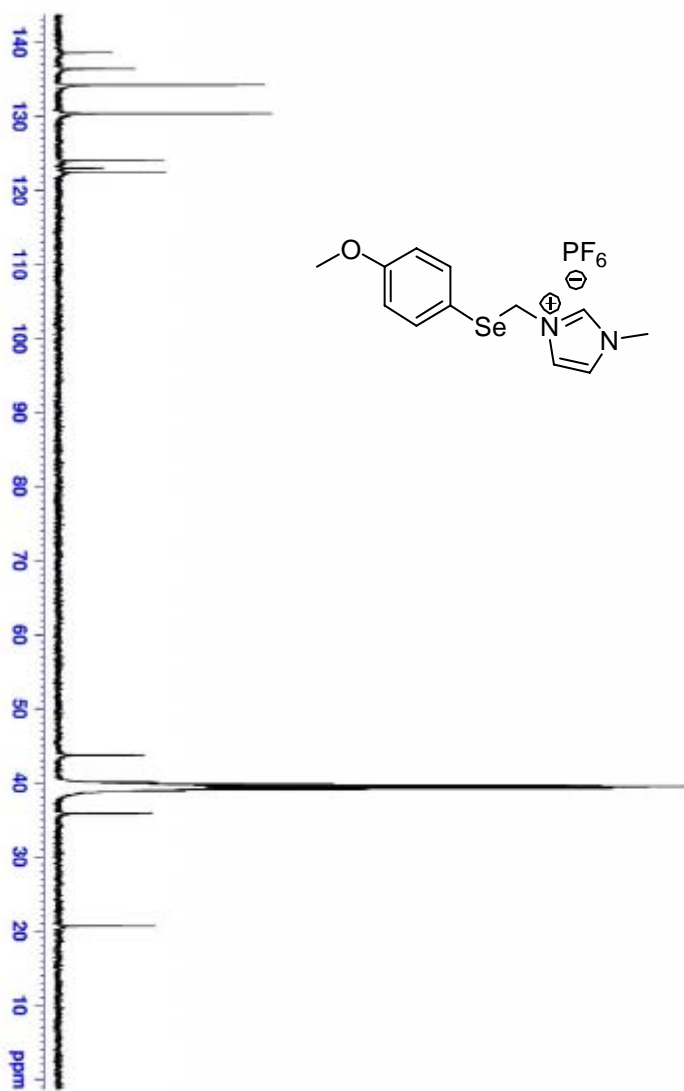

$^{13}\text{C}$  NMR of compound **5c** (DMSO, 100 MHz).

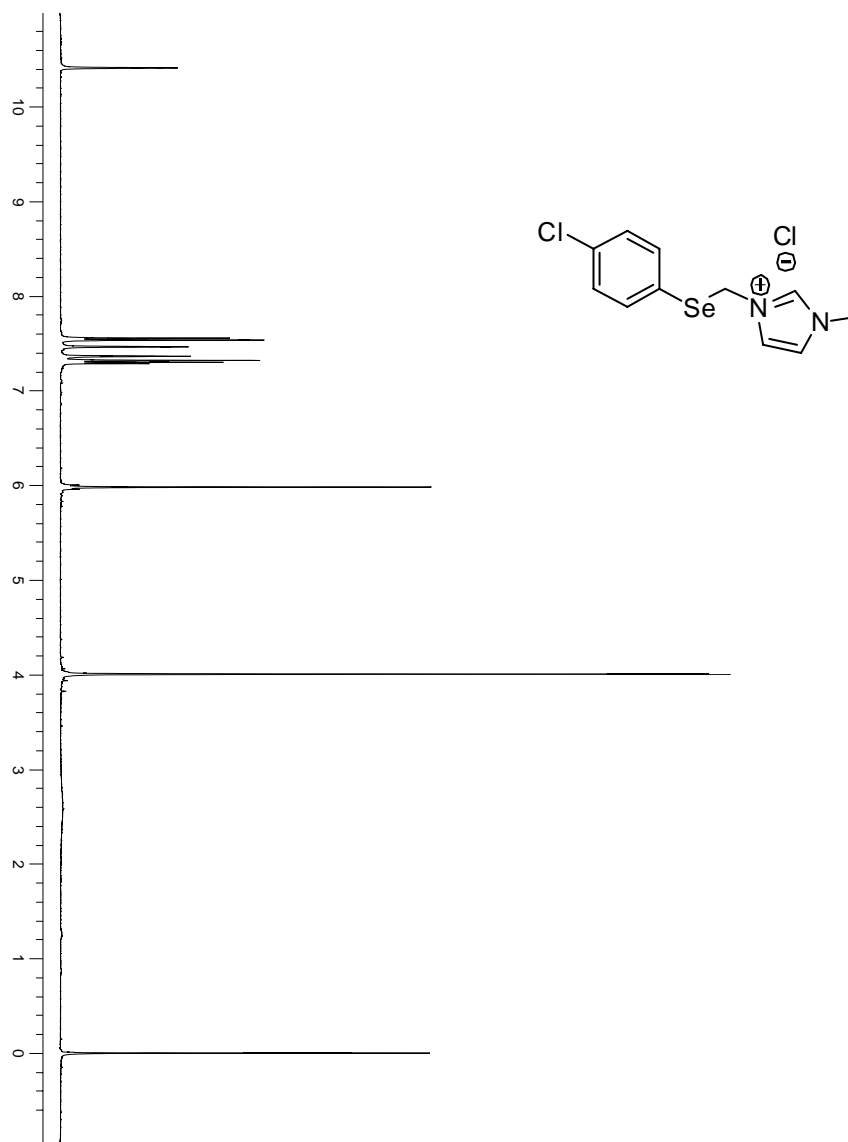

$^1\text{H}$  NMR of compound **6a** ( $\text{CDCl}_3$ , 400 MHz).



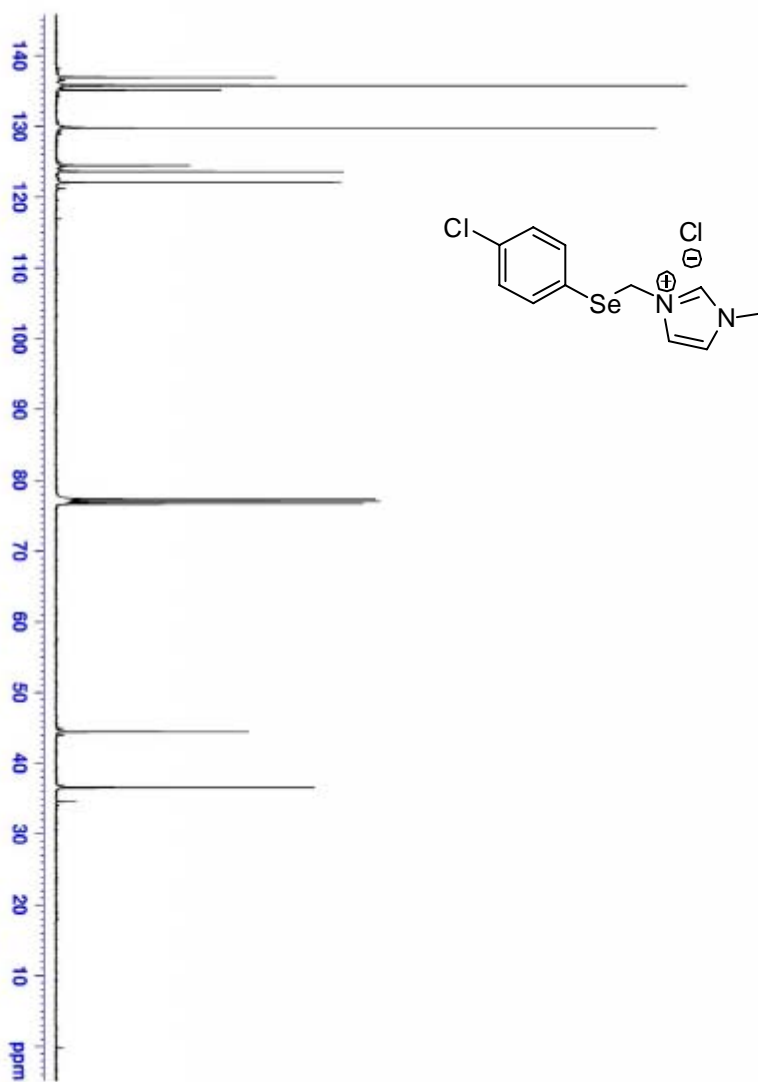

<sup>13</sup>C NMR of compound **6a** (CDCl<sub>3</sub>, 100 MHz).

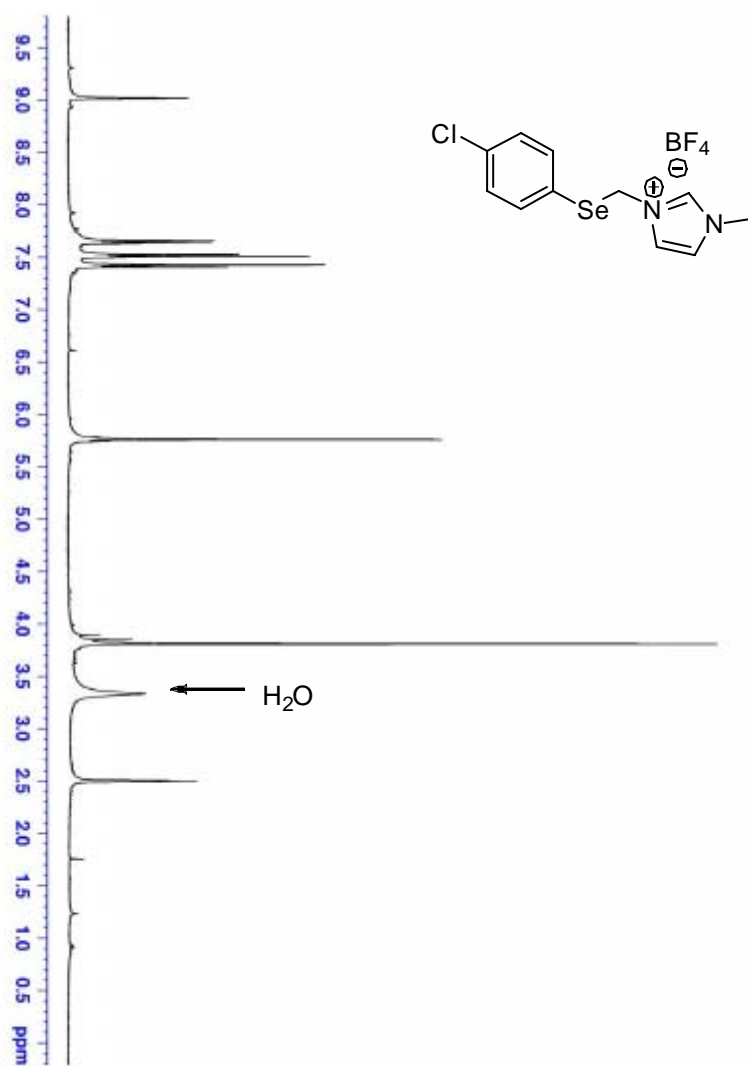

$^1\text{H}$  NMR of compound **6b** (DMSO, 400 MHz).

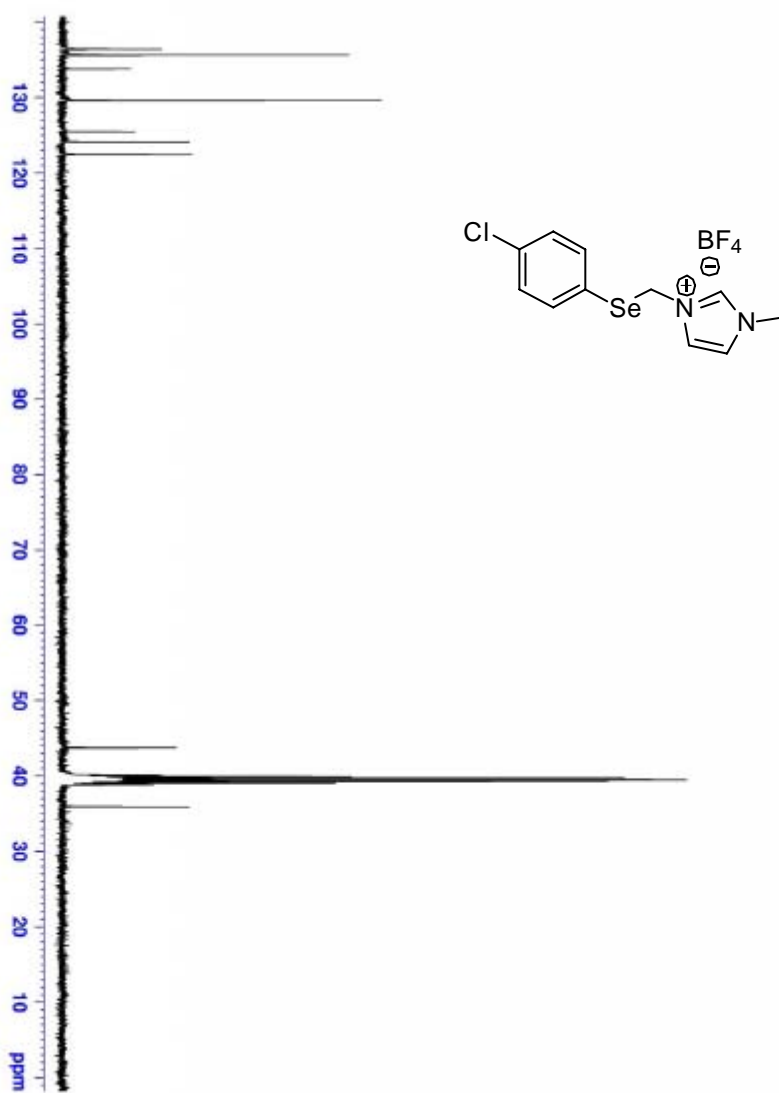

$^{13}\text{C}$  NMR of compound **6b** (DMSO, 100 MHz).

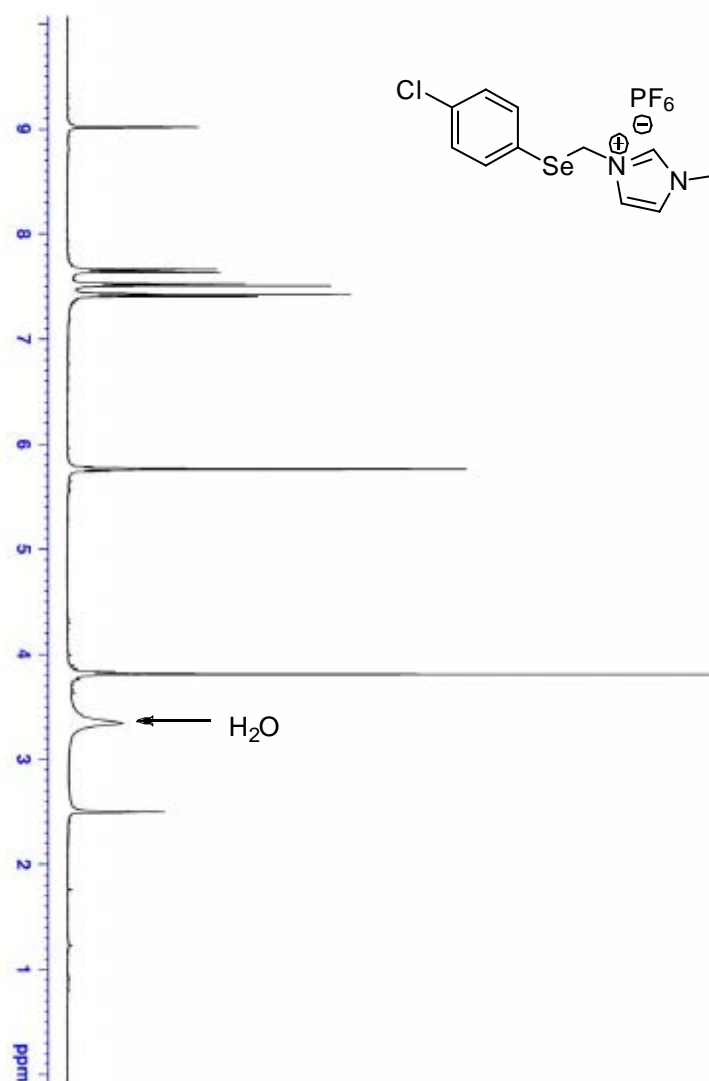

$^1\text{H}$  NMR of compound **6c** (DMSO, 400 MHz).

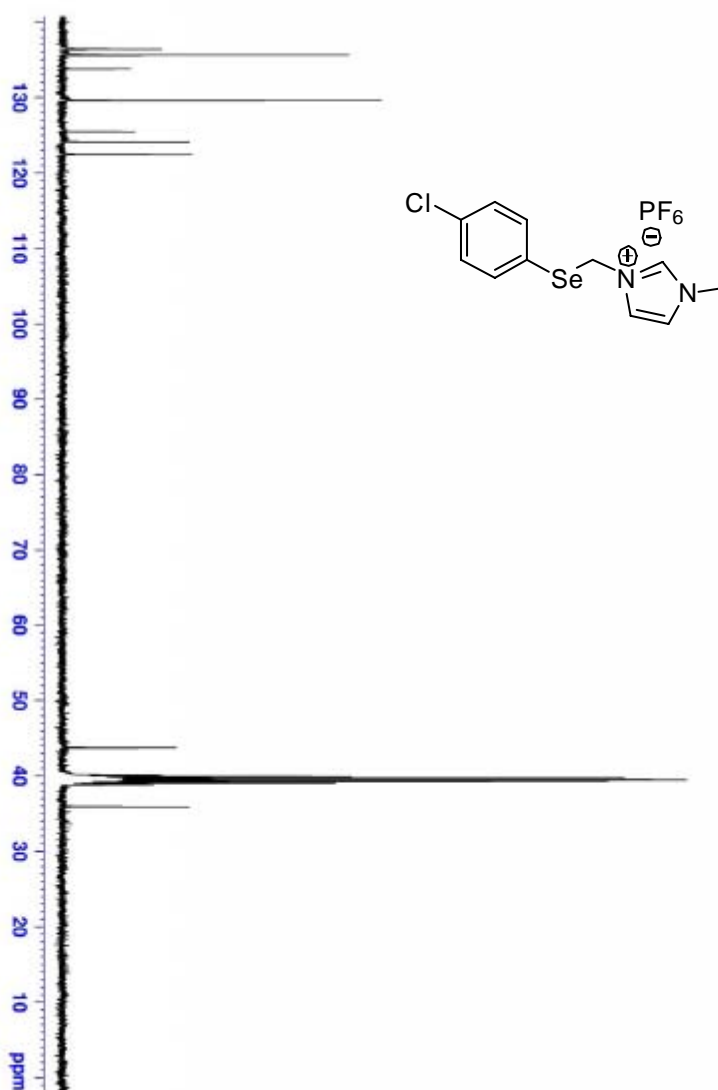

$^{13}\text{C}$  NMR of compound **6b** (DMSO, 100 MHz).



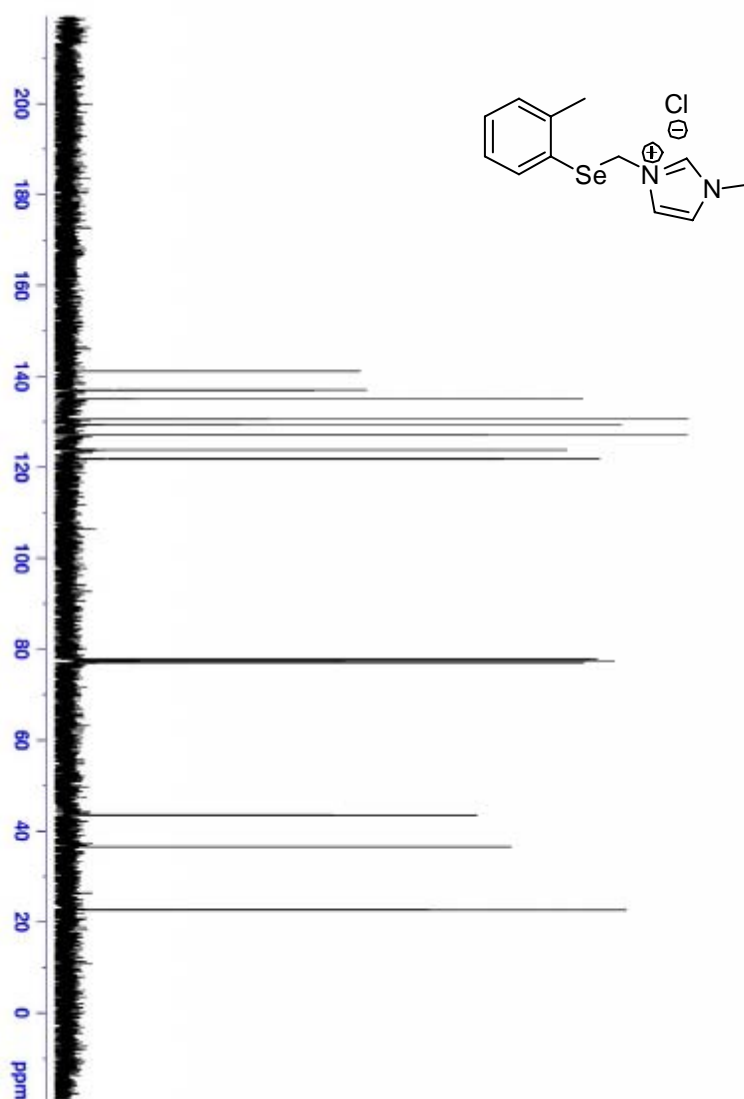

<sup>13</sup>C NMR of compound **7a** (CDCl<sub>3</sub>, 100 MHz).

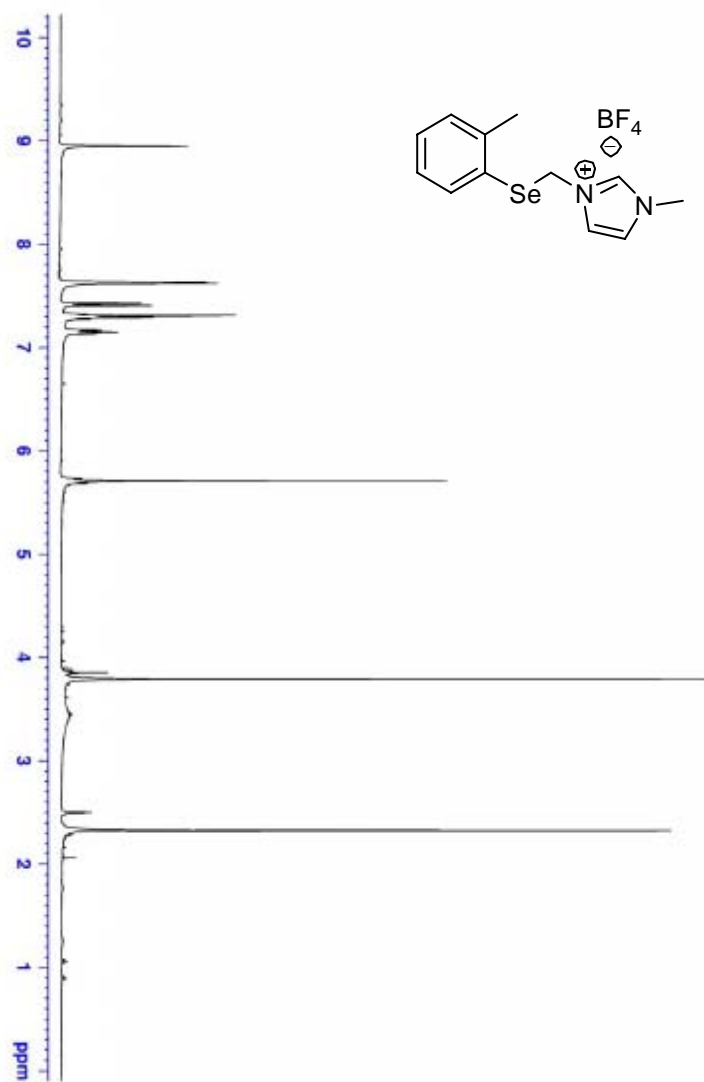

<sup>1</sup>H NMR of compound **7b** (DMSO, 400 MHz).



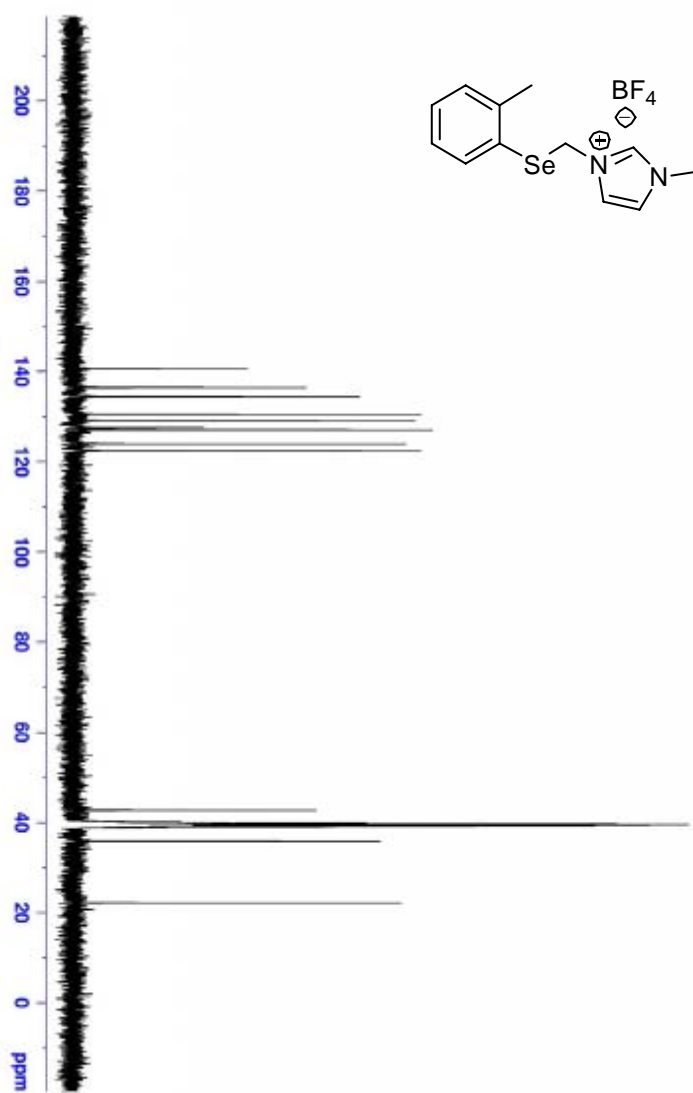

$^{13}\text{C}$  NMR of compound **7b** (DMSO, 100 MHz).

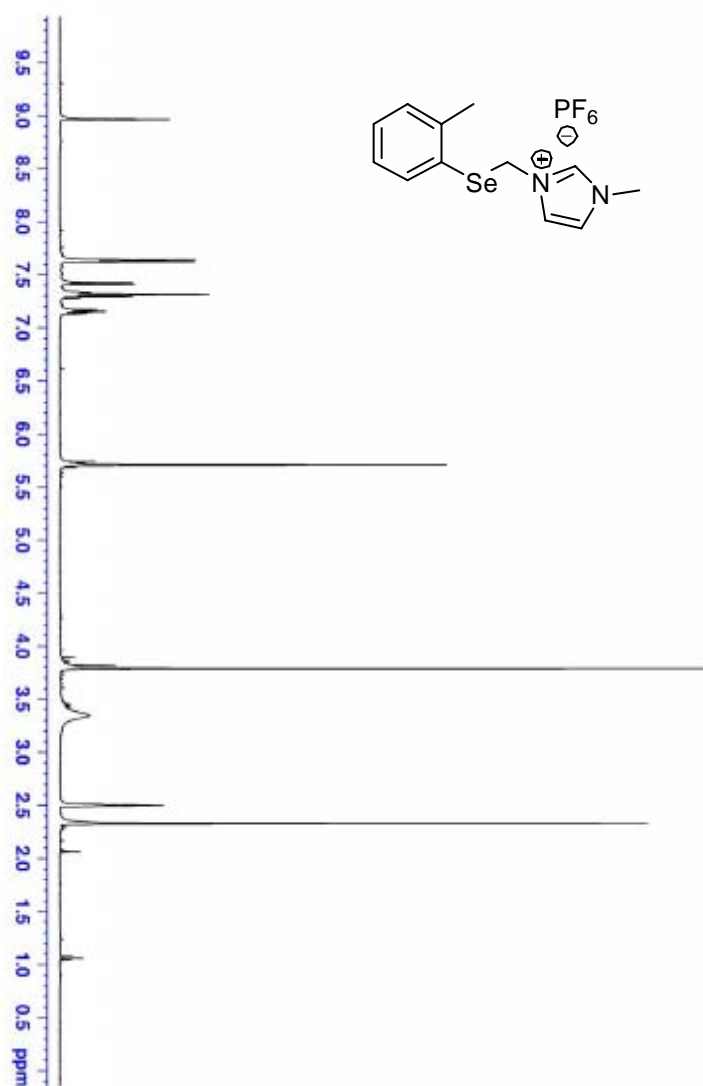

$^1\text{H}$  NMR of compound **7c** (DMSO, 400 MHz).

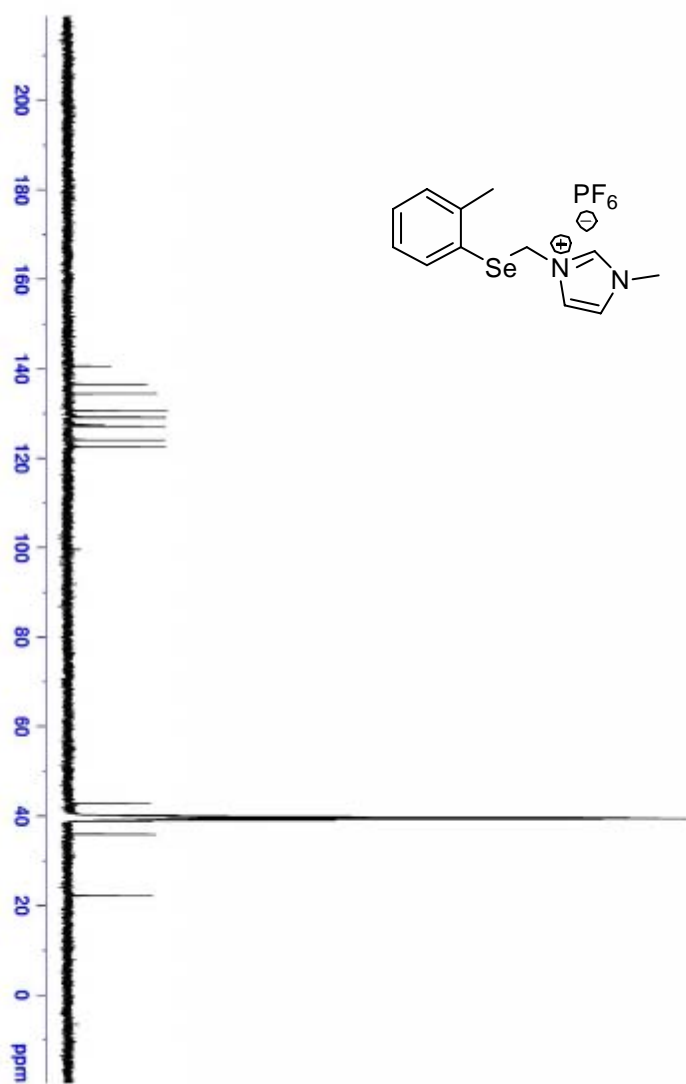

$^{13}\text{C}$  NMR of compound **7c** (DMSO, 100 MHz).

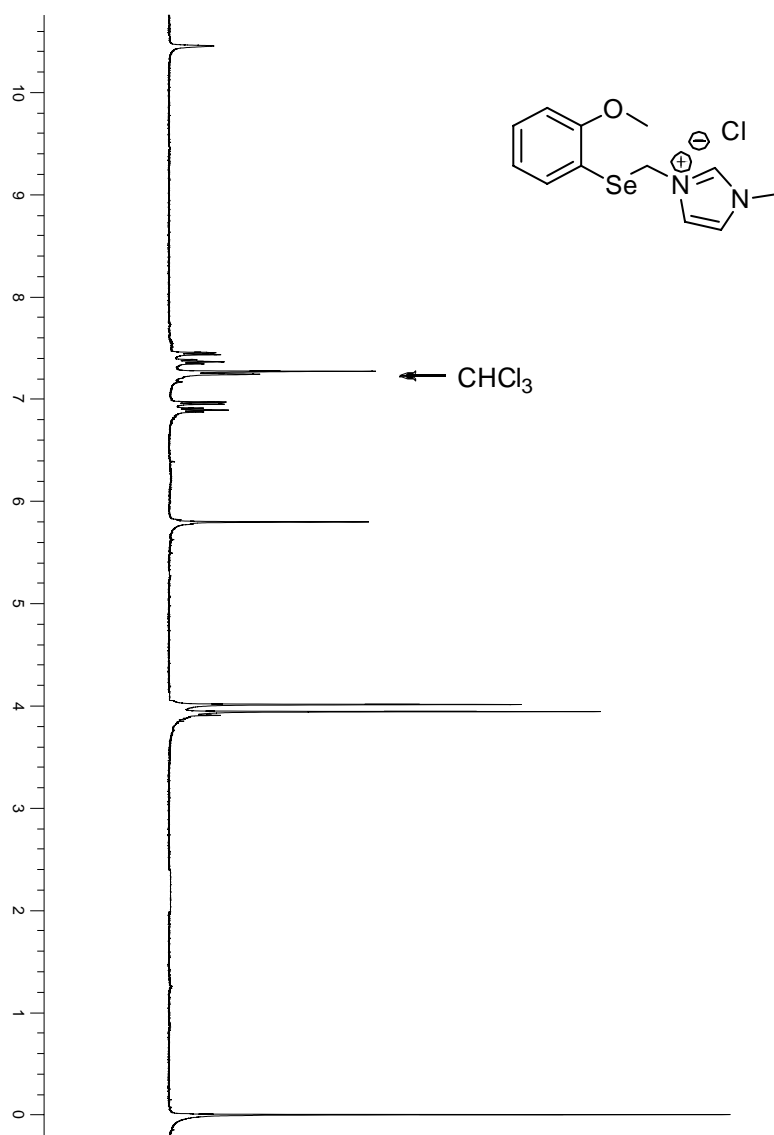

$^1\text{H}$  NMR of compound **8a** ( $\text{CDCl}_3$ , 400 MHz).

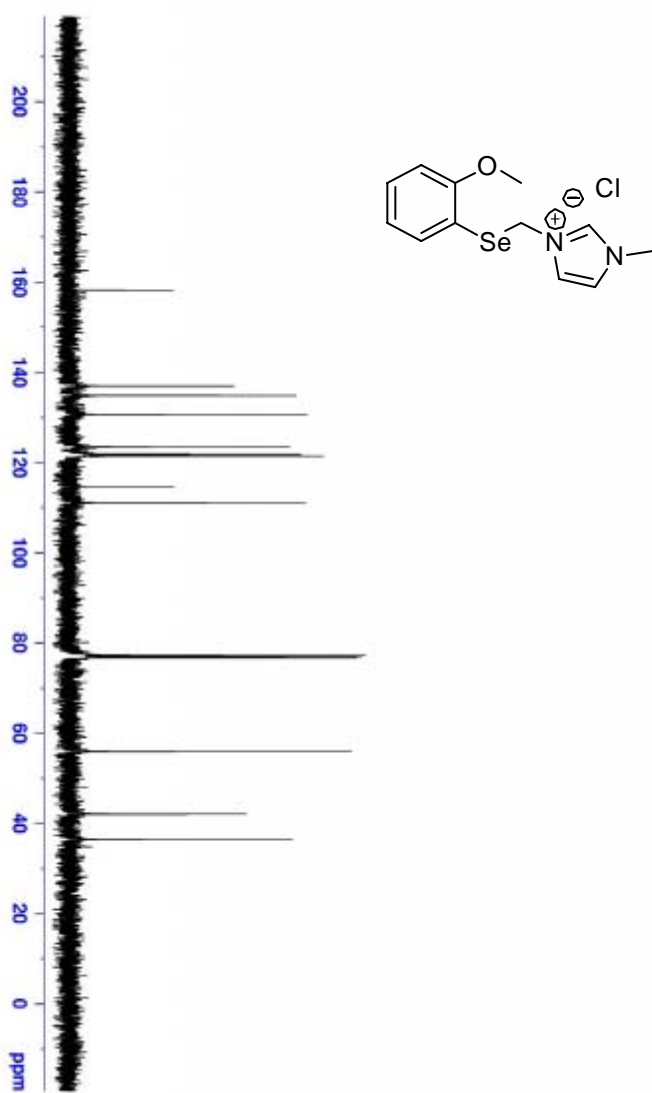

$^{13}\text{C}$  NMR of compound **8a** ( $\text{CDCl}_3$ , 100 MHz).

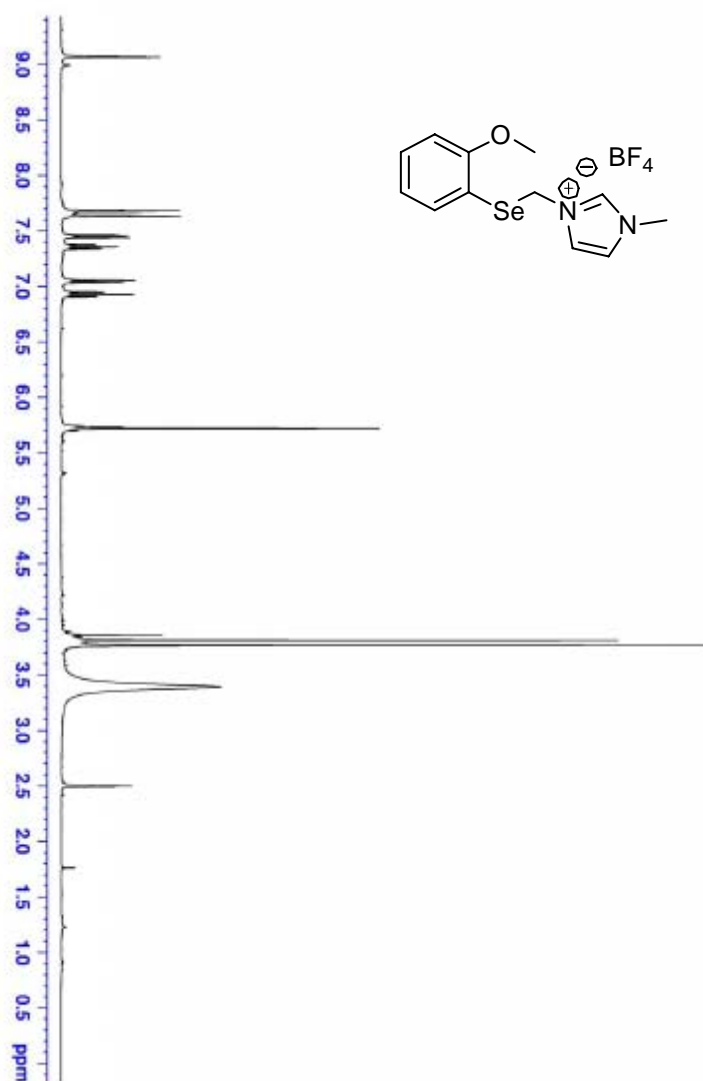

$^1\text{H}$  NMR of compound **8b** (DMSO, 400 MHz).

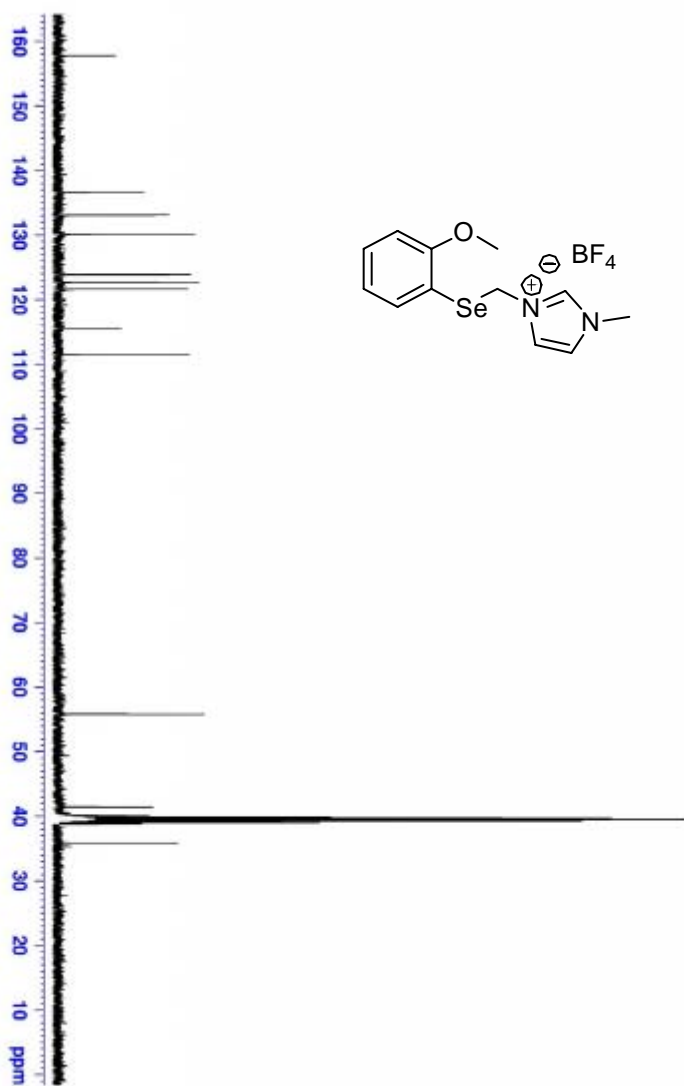

$^{13}\text{C}$  NMR of compound **8b** (DMSO, 100 MHz).





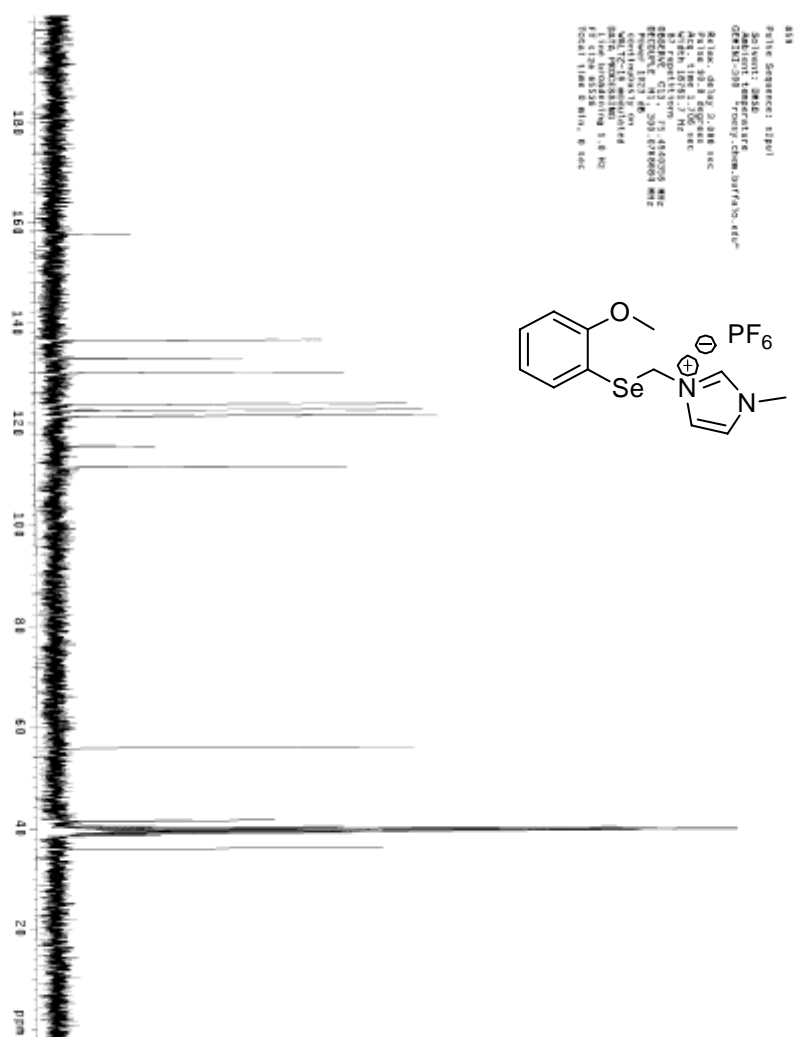

$^{13}\text{C}$  NMR of compound **8c** (DMSO, 100 MHz).

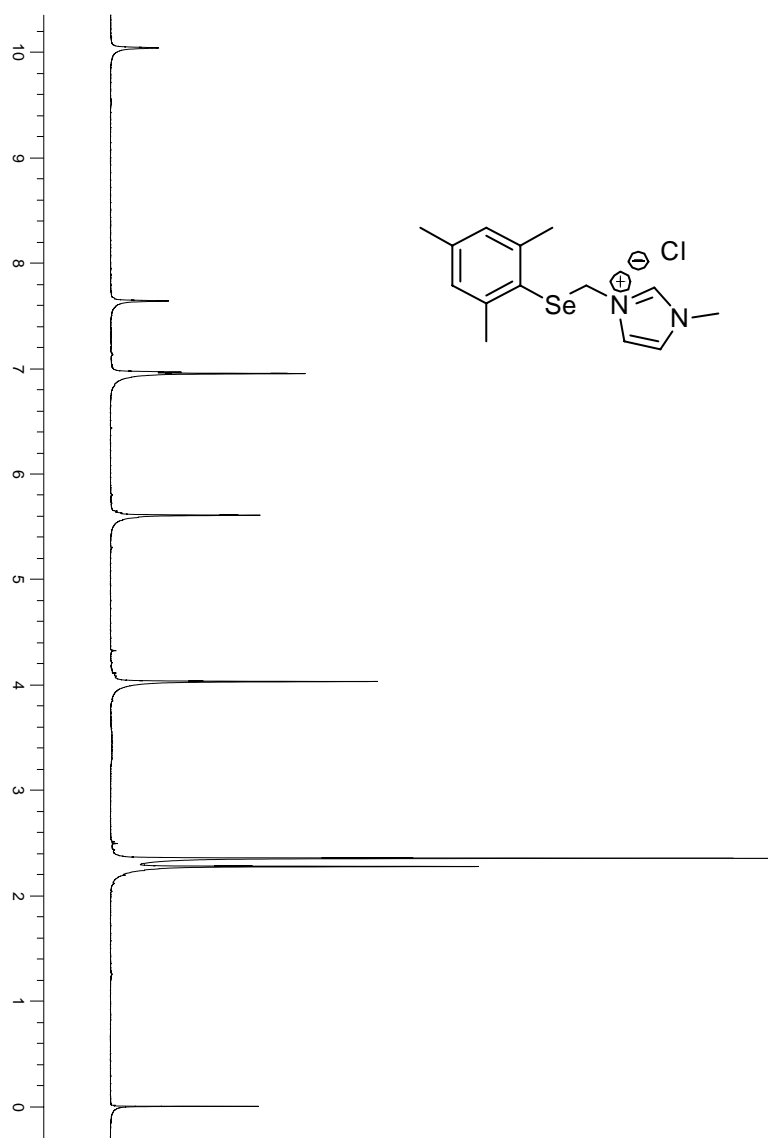

$^1\text{H}$  NMR of compound **9a** ( $\text{CDCl}_3$ , 400 MHz).

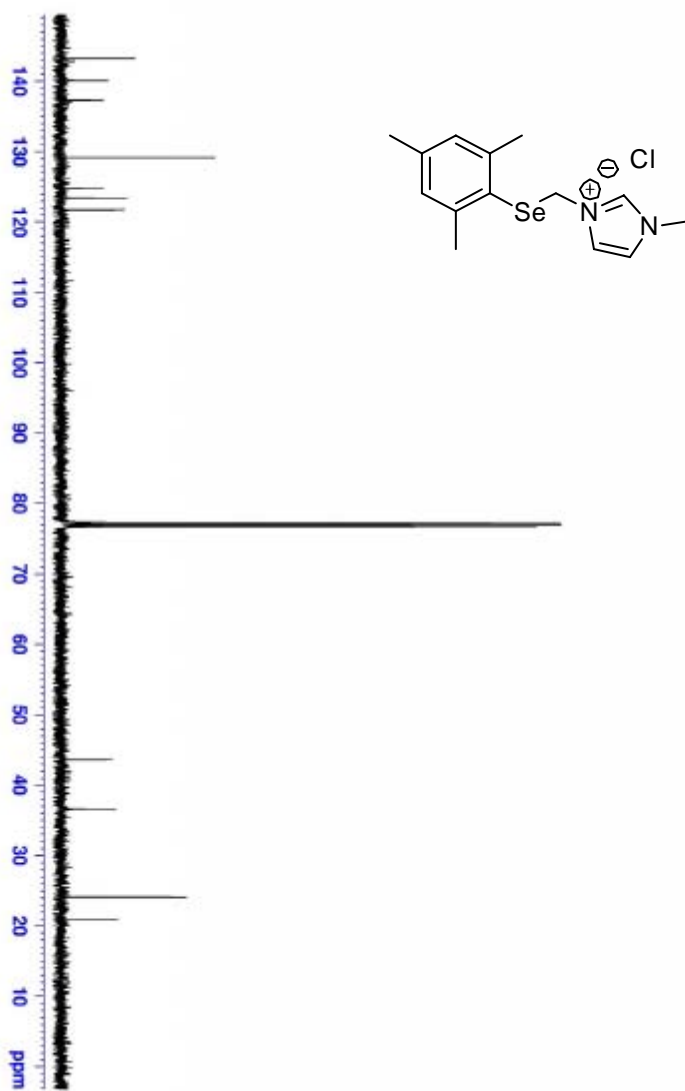

$^{13}\text{C}$  NMR of compound **9a** ( $\text{CDCl}_3$ , 100 MHz).

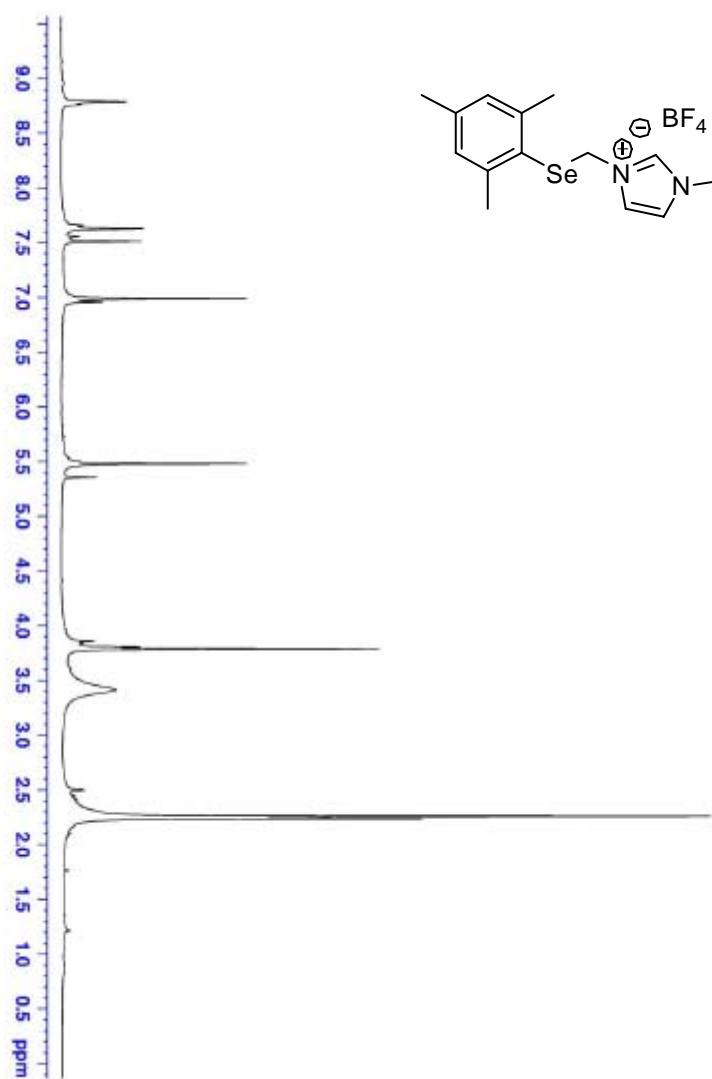

$^1\text{H}$  NMR of compound **9b** (DMSO, 400 MHz).

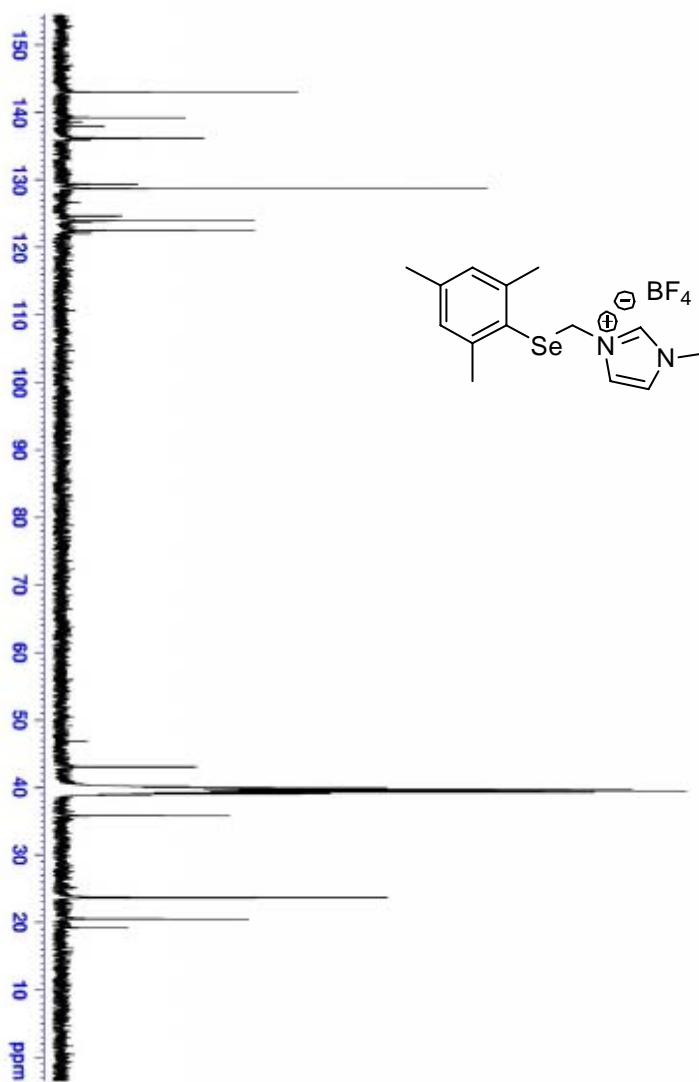

$^{13}\text{C}$  NMR of compound **9b** (DMSO, 100 MHz).

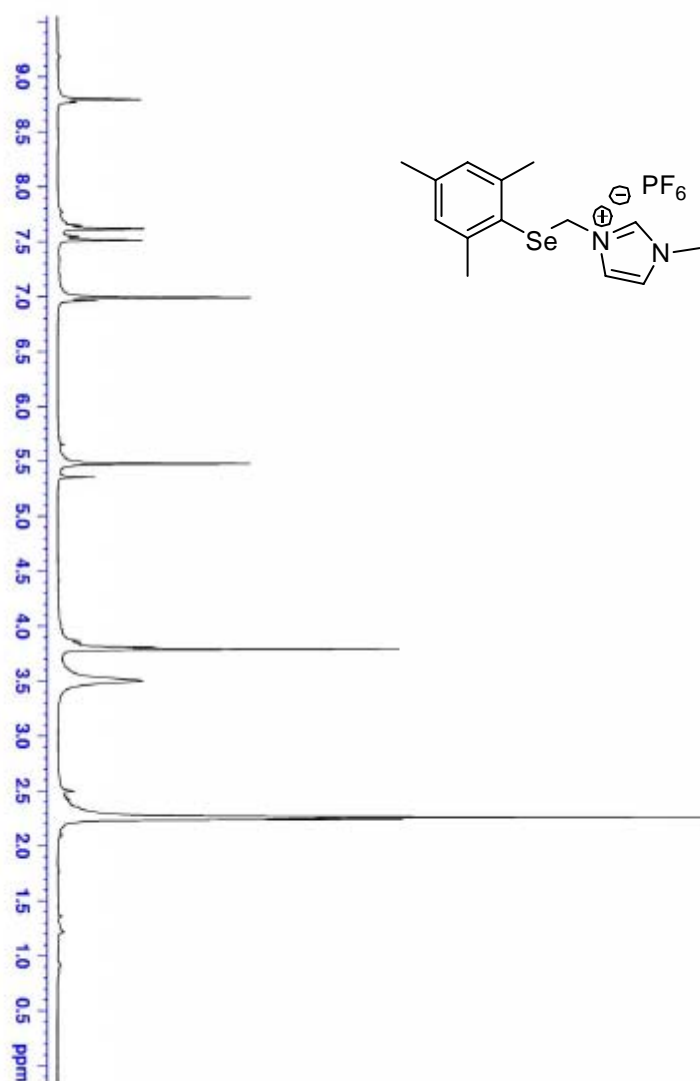

$^1\text{H}$  NMR of compound **9c** (DMSO, 400 MHz).

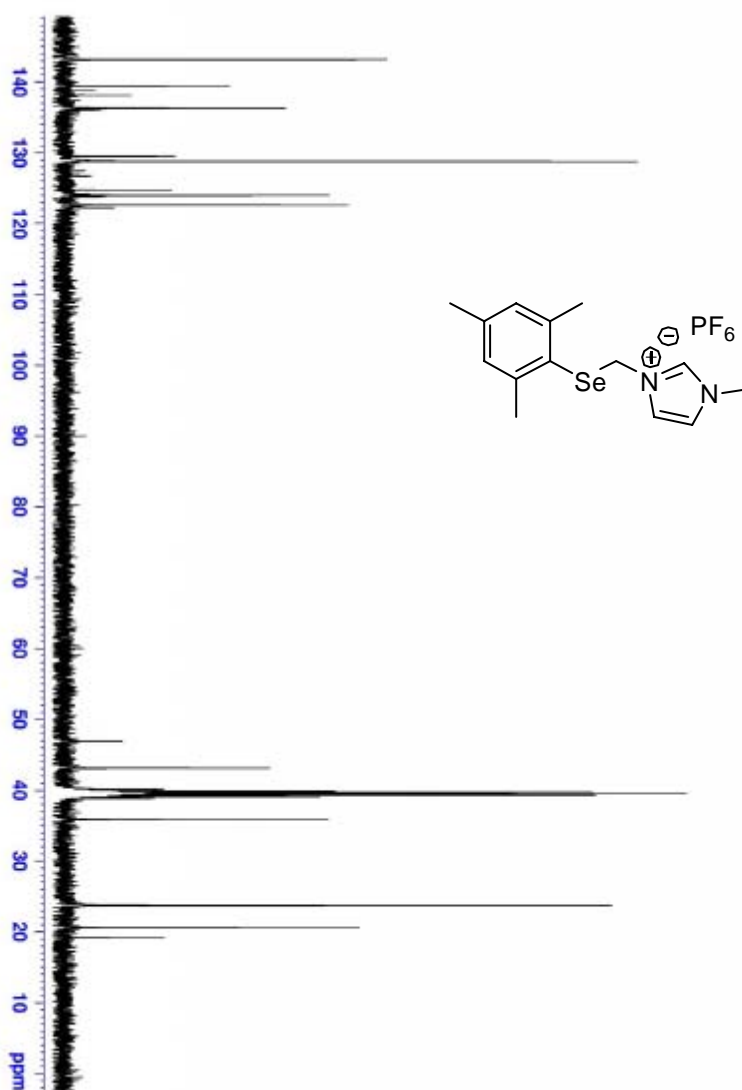

$^{13}\text{C}$  NMR of compound **9c** (DMSO, 100 MHz).

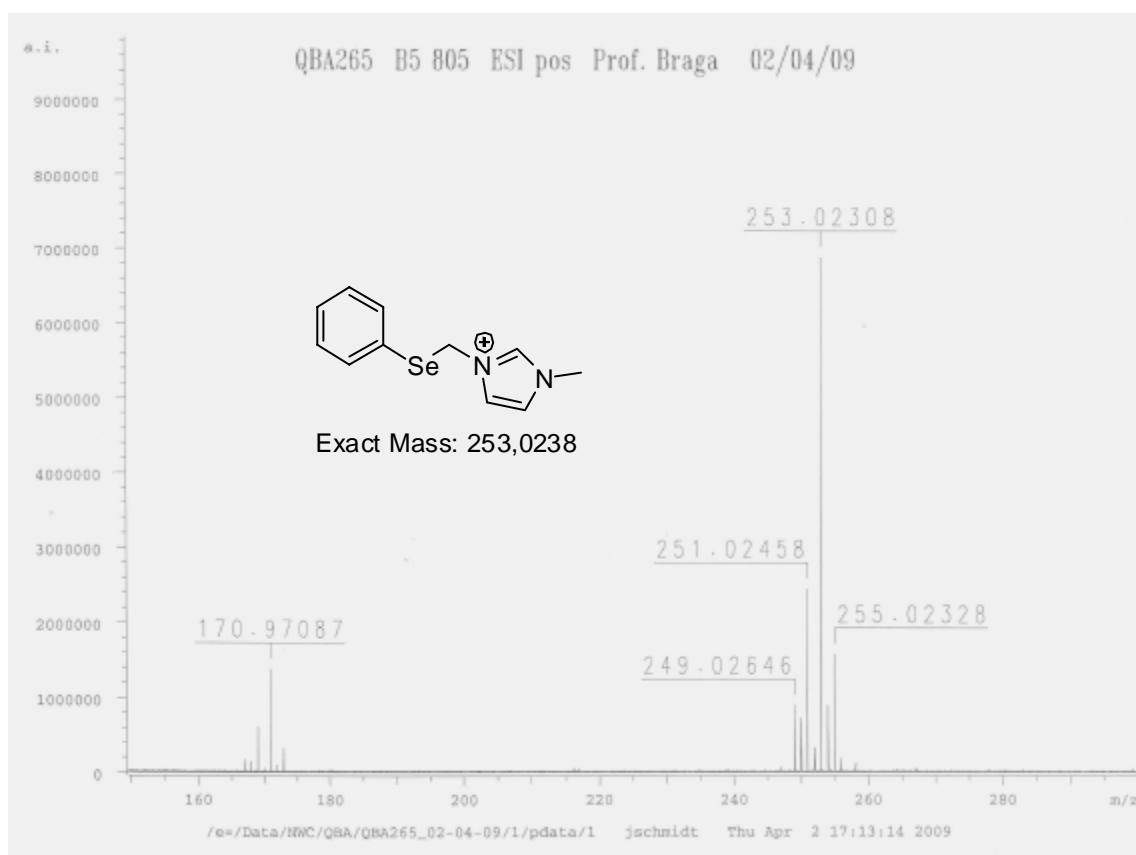

XMAS Mass Analysis for /e=/Data/NWC/QBA/QBA265\_02-04-09/1/pdata/1/massanal.re

XMAS Mass Analysis Constraints

Ion mass = 253.0230800

Charge = +1

Tolerance = 0.0250000

DBE min = -2

DBE max = 200

Max Candidates = 100

| Atom | #(min, max) | Wt%(min, max) |
|------|-------------|---------------|
| 12C  | 1 200       | 0.00 100.00   |
| 1H   | 1 300       | 0.00 100.00   |
| 16O  | 0 5         | 0.00 100.00   |
| 14N  | 0 4         | 0.00 100.00   |
| 80Se | 1 1         | 0.00 100.00   |

| # | 12C | 1H | 16O | 14N | 80Se | mass        | DBE  | error     |
|---|-----|----|-----|-----|------|-------------|------|-----------|
| 1 | 11  | 13 | 0   | 2   | 1    | 253.0238466 | 6.5  | 3.030e-06 |
| 2 | 8   | 15 | 3   | 1   | 1    | 253.0211666 | 2.0  | 7.562e-06 |
| 3 | 6   | 13 | 2   | 4   | 1    | 253.0198239 | 2.5  | 1.287e-05 |
| 4 | 3   | 15 | 5   | 3   | 1    | 253.0171438 | -2.0 | 2.346e-05 |
| 5 | 4   | 17 | 5   | 2   | 1    | 253.0297199 | -2.5 | 2.624e-05 |
| 6 | 7   | 15 | 2   | 3   | 1    | 253.0324000 | 2.0  | 3.683e-05 |
| 7 | 12  | 13 | 1   | 0   | 1    | 253.0126133 | 6.5  | 4.137e-05 |
| 8 | 9   | 17 | 3   | 0   | 1    | 253.0337426 | 1.5  | 4.214e-05 |
| 9 | 10  | 11 | 0   | 3   | 1    | 253.0112706 | 7.0  | 4.667e-05 |



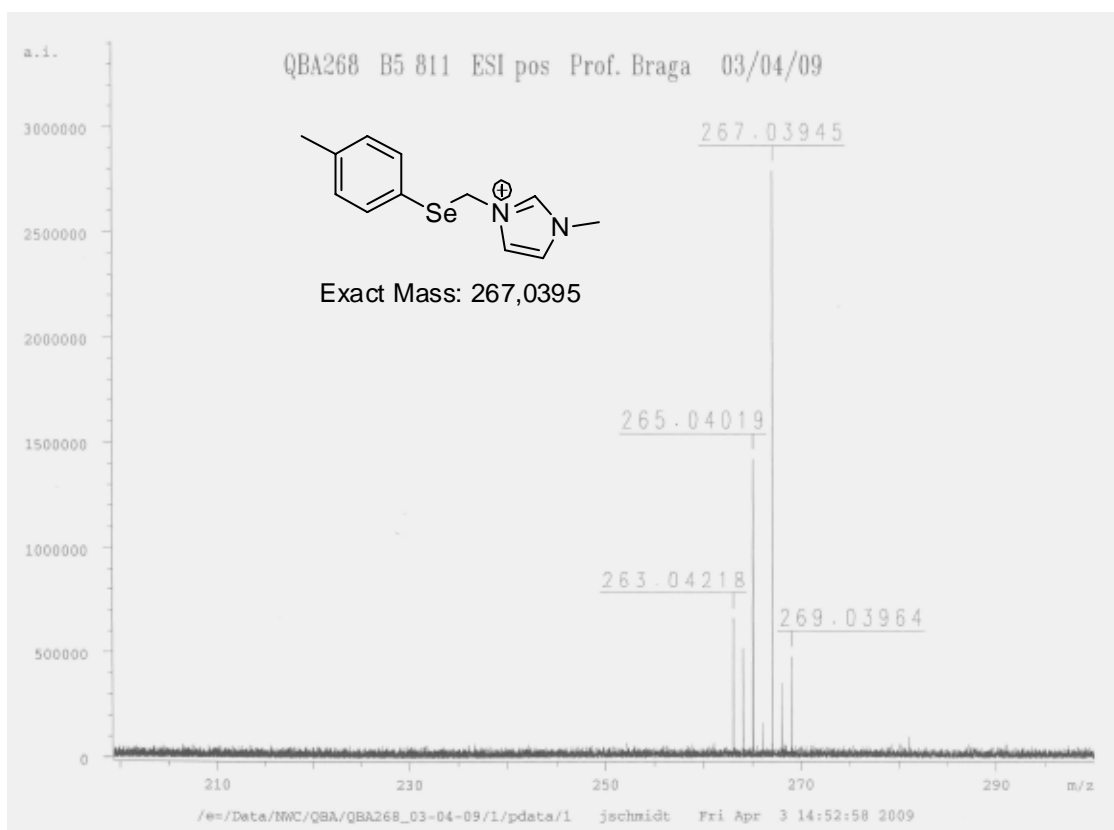

XMAS Mass Analysis for /e-/Data/NWC/QBA/QBA268\_03-04-09/1/pdata/1/massanal.re

XMAS Mass Analysis Constraints

Ion mass = 267.0394540

Charge = +1

Tolerance = 0.0250000

DBE min = -2

DBE max = 200

Max Candidates = 100

| Atom | #(min, max) | Wt%(min, max) |
|------|-------------|---------------|
| 12C  | 1 200       | 0.00 100.00   |
| 1H   | 1 300       | 0.00 100.00   |
| 16O  | 0 5         | 0.00 100.00   |
| 14N  | 0 4         | 0.00 100.00   |
| 80Se | 1 2         | 0.00 100.00   |

| #                                      | 12C | 1H | 16O | 14N | 80Se | mass        | DBE  | error     |
|----------------------------------------|-----|----|-----|-----|------|-------------|------|-----------|
| *** Mass Analysis for mass 267.0394540 |     |    |     |     |      |             |      |           |
| 1                                      | 12  | 15 | 0   | 2   | 1    | 267.0394967 | 6.5  | 1.599e-07 |
| 2                                      | 9   | 17 | 3   | 1   | 1    | 267.0368166 | 2.0  | 9.876e-06 |
| 3                                      | 7   | 15 | 2   | 4   | 1    | 267.0354740 | 2.5  | 1.490e-05 |
| 4                                      | 5   | 19 | 5   | 2   | 1    | 267.0453700 | -2.5 | 2.215e-05 |
| 5                                      | 4   | 17 | 5   | 3   | 1    | 267.0327939 | -2.0 | 2.494e-05 |
| 6                                      | 8   | 17 | 2   | 3   | 1    | 267.0480500 | 2.0  | 3.219e-05 |
| 7                                      | 10  | 19 | 3   | 0   | 1    | 267.0493927 | 1.5  | 3.722e-05 |
| 8                                      | 13  | 15 | 1   | 0   | 1    | 267.0282633 | 6.5  | 4.191e-05 |

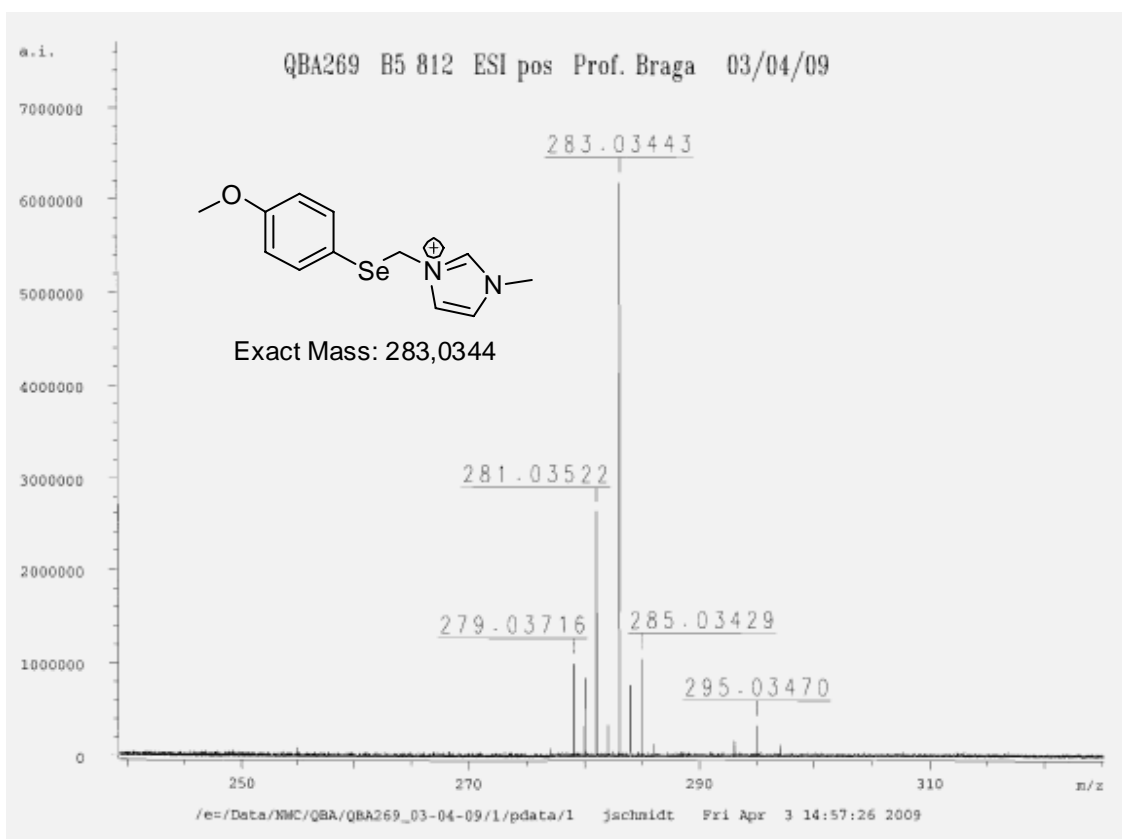

XMSS Mass Analysis for /e-/Data/NWC/QBA/QBA269\_03-04-09/1/pdata/1/massanal.re

XMSS Mass Analysis Constraints

Ion mass = 283.0344330  
 Charge = +1  
 Tolerance = 0.0250000

DBE min = -2  
 DBE max = 200

Max Candidates = 100

| Atom | #(min, max) | Wt%(min, max) |
|------|-------------|---------------|
| 12C  | 1 200       | 0.00 100.00   |
| 1H   | 1 300       | 0.00 100.00   |
| 16O  | 0 5         | 0.00 100.00   |
| 14N  | 0 4         | 0.00 100.00   |
| 80Se | 1 2         | 0.00 100.00   |

  

| #                                      | 12C | 1H | 16O | 14N | 80Se | mass        | DBE | error     |
|----------------------------------------|-----|----|-----|-----|------|-------------|-----|-----------|
| *** Mass Analysis for mass 283.0344330 |     |    |     |     |      |             |     |           |
| 1                                      | 12  | 15 | 1   | 2   | 1    | 283.0344113 | 6.5 | 7.655e-08 |
| 2                                      | 9   | 17 | 4   | 1   | 1    | 283.0317313 | 2.0 | 9.546e-06 |
| 3                                      | 7   | 15 | 3   | 4   | 1    | 283.0303886 | 2.5 | 1.429e-05 |
| 4                                      | 8   | 17 | 3   | 3   | 1    | 283.0429646 | 2.0 | 3.014e-05 |
| 5                                      | 10  | 19 | 4   | 0   | 1    | 283.0443073 | 1.5 | 3.489e-05 |
| 6                                      | 11  | 15 | 0   | 4   | 1    | 283.0456447 | 6.5 | 3.961e-05 |
| 7                                      | 13  | 15 | 2   | 0   | 1    | 283.0231779 | 6.5 | 3.977e-05 |

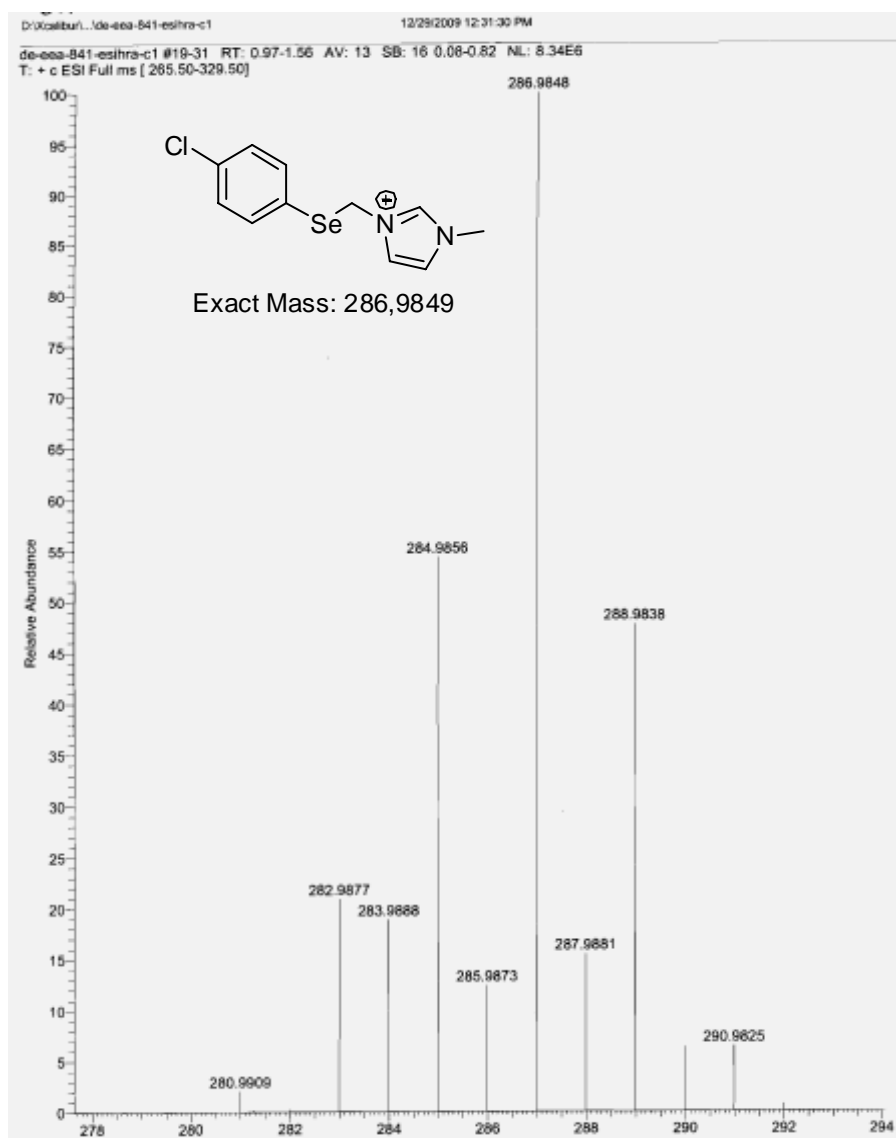

| Isotope: | Min. . . Max. |
|----------|---------------|
| 1 H      | 0...400       |
| 12 C     | 0...400       |
| 14 N     | 0...2         |
| 23 Na    | 0...8         |
| 16 O     | 0...8         |
| 138 Te   | 0...8         |
| 128 Te   | 0...8         |
| 32 S     | 0...8         |
| 127 I    | 8...0         |
| 79 Se    | 0...0         |
| 28 Si    | 0...0         |
| 83 Se    | 8...1         |
| 19 F     | 0...0         |
| 81 Kr    | 0...0         |
| 76 Se    | 0...0         |
| 31 P     | 0...0         |
| 35 Cl    | 1...1         |

Tolerance Window: +/- 5.00 ppm  
 Sb/Ring Equiv: -1.. 100  
 Fits: 280

H-Rule: Do not use  
 Charge: 1

SPECTROM - MS  
 de-esa-841-eslra-c1.BAM  
 + c ESI Full ms [ 285.50-329.50]  
 Range: 285.50- 329.50  
 Scan #: 19-31  
 RT: 0.97-1.56  
 AV: 13  
 Data points: 32

| Mass      | Relative Intensity | Theoretical Mass | Delta [ppm] | MS  | Composition                                                                     |
|-----------|--------------------|------------------|-------------|-----|---------------------------------------------------------------------------------|
| 286.98477 | 100.0              | 286.9849         | -0.4        | 6.3 | C <sub>11</sub> H <sub>12</sub> Se <sub>2</sub> Cl <sub>1</sub> Se <sub>1</sub> |

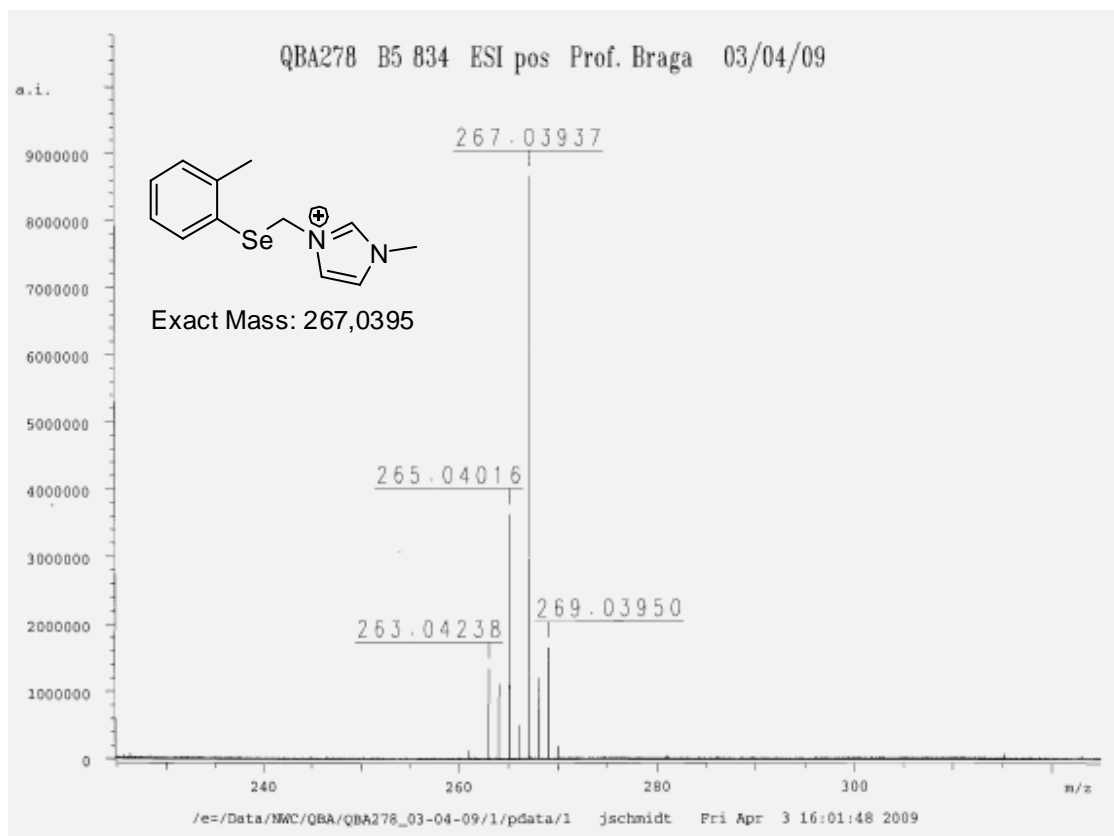

XMASS Mass Analysis for /e=/Data/NWC/QBA/QBA278\_03-04-09/1/pdata/1/massanal.re

XMASS Mass Analysis Constraints

Ion mass = 267.0393700

Charge = +1

Tolerance = 0.0250000

DBE min = -2

DBE max = 200

Max Candidates = 100

| Atom | #(min, max) | Wt%(min, max) |
|------|-------------|---------------|
| 12C  | 1 200       | 0.00 100.00   |
| 1H   | 1 300       | 0.00 100.00   |
| 16O  | 0 5         | 0.00 100.00   |
| 14N  | 0 4         | 0.00 100.00   |
| 80Se | 1 2         | 0.00 100.00   |

| #                                      | 12C | 1H | 16O | 14N | 80Se | mass        | DBE  | error     |
|----------------------------------------|-----|----|-----|-----|------|-------------|------|-----------|
| *** Mass Analysis for mass 267.0393700 |     |    |     |     |      |             |      |           |
| 1                                      | 12  | 15 | 0   | 2   | 1    | 267.0394967 | 6.5  | 4.745e-07 |
| 2                                      | 9   | 17 | 3   | 1   | 1    | 267.0368166 | 2.0  | 9.562e-06 |
| 3                                      | 7   | 15 | 2   | 4   | 1    | 267.0354740 | 2.5  | 1.459e-05 |
| 4                                      | 5   | 19 | 5   | 2   | 1    | 267.0453700 | -2.5 | 2.247e-05 |
| 5                                      | 4   | 17 | 5   | 3   | 1    | 267.0327939 | -2.0 | 2.463e-05 |
| 6                                      | 8   | 17 | 2   | 3   | 1    | 267.0480500 | 2.0  | 3.250e-05 |
| 7                                      | 10  | 19 | 3   | 0   | 1    | 267.0493927 | 1.5  | 3.753e-05 |
| 8                                      | 13  | 15 | 1   | 0   | 1    | 267.0282633 | 6.5  | 4.159e-05 |
| 9                                      | 11  | 13 | 0   | 3   | 1    | 267.0269207 | 7.0  | 4.662e-05 |

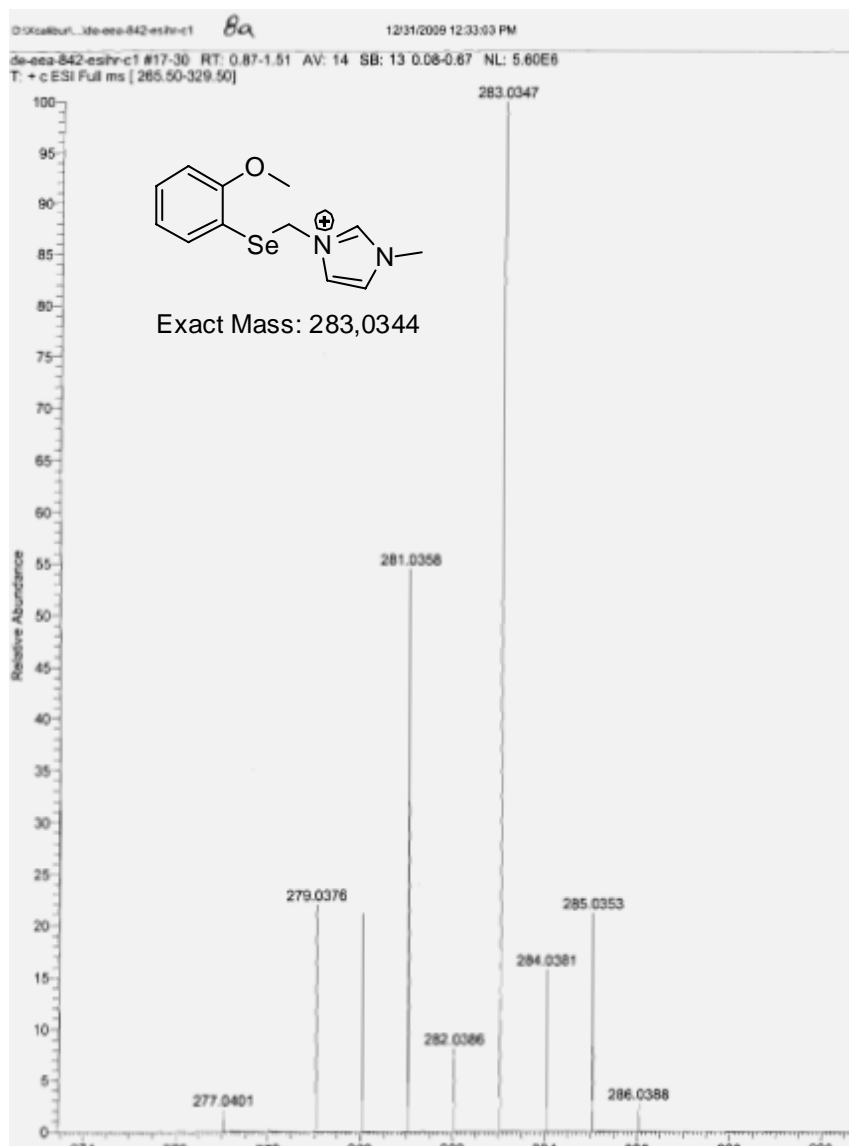

| Isotope: | Min.     | Max.     |
|----------|----------|----------|
| 1 H      | 0.000000 | 0.000000 |
| 12 C     | 0.000000 | 0.000000 |
| 14 N     | 0.000000 | 0.000000 |
| 23 Na    | 0.000000 | 0.000000 |
| 16 O     | 0.000000 | 0.000000 |
| 130 Te   | 0.000000 | 0.000000 |
| 128 Te   | 0.000000 | 0.000000 |
| 32 S     | 0.000000 | 0.000000 |
| 127 I    | 0.000000 | 0.000000 |
| 79 Br    | 0.000000 | 0.000000 |
| 28 Si    | 0.000000 | 0.000000 |
| 80 Se    | 1.000000 | 1.000000 |
| 19 F     | 0.000000 | 0.000000 |
| 81 Br    | 0.000000 | 0.000000 |
| 78 Se    | 0.000000 | 0.000000 |
| 31 P     | 0.000000 | 0.000000 |
| 35 Cl    | 0.000000 | 0.000000 |

Tolerance Window: ± 5.00 ppm  
 Db/Ring Equiv: -1.. 100  
 n-Rule: Do not use  
 Charge: 1

SPECTRUM - MS  
 de-esa-842-eslhr-c1.RAW  
 + c ESI Full ms [ 265.50-329.50]  
 Range: 265.50- 329.50  
 Scan #: 17-30  
 RT: 0.87-1.51  
 AV: 14  
 Data points: 30

| Mass      | Relative Intensity | Theoretical Mass | Delta [ppm] | RDG | Composition                                                                   |
|-----------|--------------------|------------------|-------------|-----|-------------------------------------------------------------------------------|
| 283.03473 | 100.0              | 283.0344         | 1.1         | 6.5 | C <sub>11</sub> H <sub>10</sub> O <sub>2</sub> N <sub>2</sub> Se <sub>1</sub> |

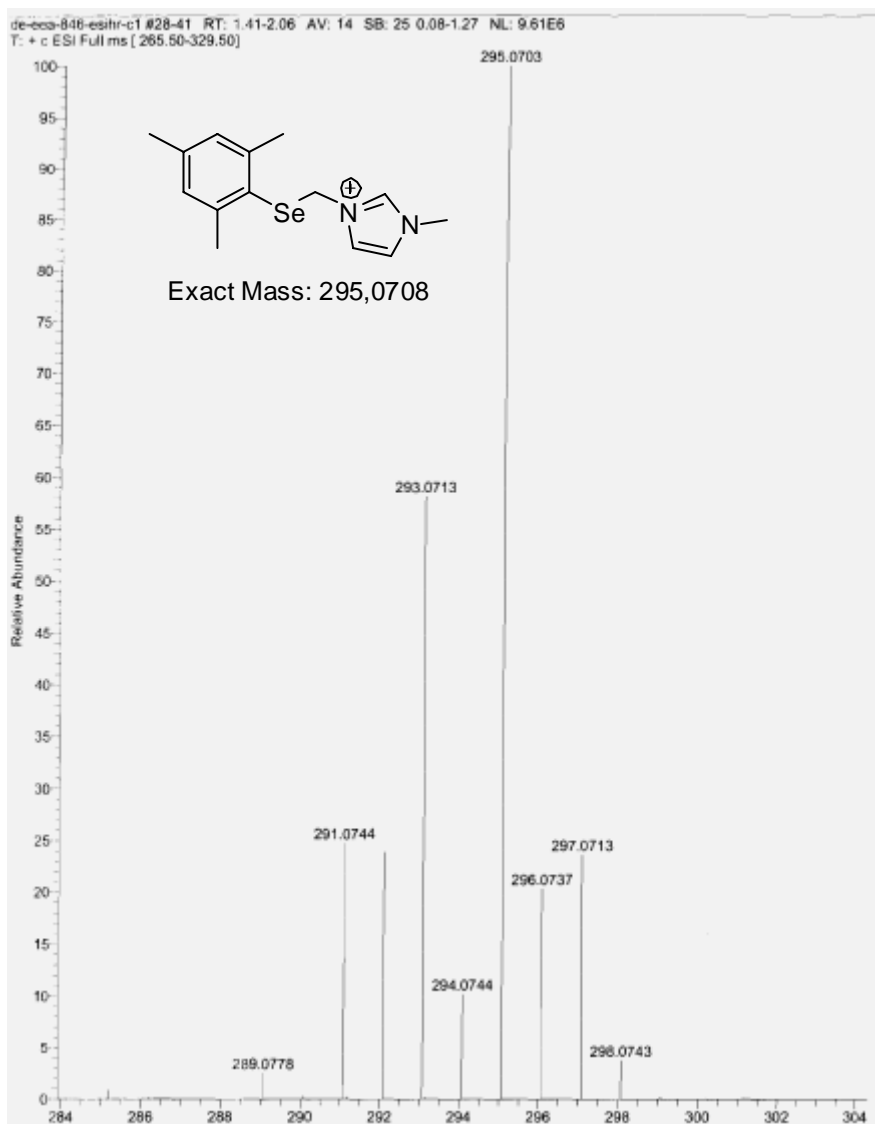

|                   |              |                    |
|-------------------|--------------|--------------------|
| Isotope:          | Min. .. Max. |                    |
| 1 H               | 0....480     |                    |
| 12 C              | 0....480     |                    |
| 14 N              | 0....3       |                    |
| 23 Na             | 0....0       |                    |
| 16 O              | 0....2       |                    |
| 130 Te            | 0....0       |                    |
| 128 Te            | 0....0       |                    |
| 32 S              | 0....0       |                    |
| 127 I             | 0....0       |                    |
| 79 Br             | 0....0       |                    |
| 26 Si             | 0....0       |                    |
| 80 Se             | 1....1       |                    |
| 19 F              | 0....0       |                    |
| 81 Se             | 0....0       |                    |
| 74 Se             | 0....0       |                    |
| 31 P              | 0....0       |                    |
| 35 Cl             | 0....0       |                    |
| Tolerance Window: | ± 5.00 ppm   |                    |
| Db/ling Expiv:    | -1.. 100     | N-Rule: Do not use |
| Fits:             | 100          | Charge: 1          |

SPECTRUM - MS  
 de-eca-848-eslhr-c1.RAW  
 + c ESI Full ms [ 285.50-329.50]  
 Range: 285.50- 329.50  
 Scan #: 28-41  
 RT: 1.41-2.06  
 AV: 14  
 Data points: 16

| Mass      | Relative Intensity | Theoretical Mass | Delta [ppm] | MS  | Composition                                                    |
|-----------|--------------------|------------------|-------------|-----|----------------------------------------------------------------|
| 295.07034 | 100.0              | 295.0708         | -1.5        | 6.5 | C <sub>14</sub> H <sub>15</sub> N <sub>2</sub> Se <sub>1</sub> |
